# Supplementary material
Source: MDPI journal article supplement (https://www.mdpi.com/2075-163X/12/12/1573)
Supplement: s1 [file Supplementary Table S1.xlsx]

## Sheet: Sheet1
Supplementary Table S1
Published whole-rock major (in wt%) and trace element (in ppm) compositions for Carboniferous magmatic rocks in the Tuwu-Yandong belt (and adjacent areas in the middle section of the Dananhu island arc).
Location	Sample no	Lithology	Age	SiO2	TiO2	Al2O3	Fe2O3T	MnO	MgO	CaO	Na2O	K2O	P2O5	L.O.I	Total	Mg#	Sc	V	Cr	Co	Ni	Cu	Zn	Ga	Ge	Rb	Sr	Y	Zr	Nb	Cs	Ba	La	Ce	Pr	Nd	Sm	Eu	Gd	Tb	Dy	Ho	Er	Tm	Yb	Lu	Hf	Ta	Pb
Carboniferous intrusiv rocks
Heicaotan	X3ET-365	porphyritic granite	357	73.6567	0.258734	13.4681	1.70398	0.0547323	0.393077	1.03792	4.45222	4.32186	0.0487615	0.526316	99.94	31.3652		19.74	4.819	2.054	1.775	2.784	32.87	15.24		95.92	185.5	21.26	190.7	8.79	1.024	588.7	24.58	54.89	6.906	25.19	4.695	0.598	3.917	0.603	3.624	0.757	2.258	0.352	2.401	0.377	5.625	0.617	8.05
Heicaotan	X3ET-367	porphyritic granite	357	73.7881	0.241964	13.3161	1.66948	0.0983921	0.388548	0.823281	3.93769	4.64049	0.044176	0.594608	99.56	31.5564		17.83	3.788	2.042	1.415	3.265	42.94	15.74		99.83	211	22.81	154.4	11.59	0.73	621.5	18.96	45.32	6.106	23.29	4.789	0.566	3.891	0.636	3.889	0.821	2.46	0.39	2.7	0.429	4.977	0.791	8.515
Heicaotan	X3ET-369	porphyritic granite	357	72.7924	0.28307	13.652	1.96524	0.054592	0.506493	1.17575	4.51294	4.18134	0.0616688	0.594182	99.8	33.7995		23.25	4.601	2.673	2.522	3.388	39.52	16.36		91.33	201.5	23.19	194.8	10.59	1.589	607.8	23.36	50.53	6.808	25.48	5.081	0.649	4.16	0.663	3.972	0.82	2.468	0.382	2.593	0.414	5.749	0.723	8.46
Heicaotan	X3ET-371	porphyritic granite	357	72.8635	0.251613	13.6262	1.81175	0.0541319	0.427041	1.11772	4.52402	4.2273	0.0561368	0.521826	99.5	31.8309		20.3	4.899	2.18	1.728	3.108	38.2	15.51		88.12	197.7	20.05	164	8.879	1.324	609	21.69	47.07	6.109	22.94	4.54	0.63	3.702	0.577	3.48	0.736	2.124	0.332	2.285	0.373	4.986	0.602	11.83
Heicaotan	X3ET-373	porphyritic granite	357	73.4001	0.262403	13.5612	1.78808	0.050462	0.402687	1.05668	4.05614	4.46488	0.050462	0.398512	99.51	30.8505		20.63	5.043	1.955	1.563	2.902	38.35	15.81		101.3	166.5	24.02	164.1	11.33	1.153	492.1	26.08	55.98	7.3	26.44	5.082	0.601	4.137	0.654	4.07	0.859	2.583	0.408	2.861	0.436	5.28	0.819	8.121
Heicaotan	X3ET-375	porphyritic granite	357	73.7182	0.24706	13.7807	1.72578	0.0486021	0.372616	1.10772	4.21623	4.26382	0.0516397	0.439821	99.99	29.9587		20.29	4.312	1.984	1.858	2.697	36.09	16.25		98.11	185.8	22.31	178.8	10.27	1.131	581.2	21.16	48	6.379	24.41	4.988	0.633	4.009	0.653	3.899	0.817	2.431	0.378	2.621	0.41	5.717	0.771	7.788
Yandong deposit	YD13-91	diorite	348	51	1.09	17.6	7.61	0.15	5.45	5.25	5.27	0.99	0.36	3.64	98.4	58.6562			64	27.1	62.1					7.2	659	17.3	64	3.6	2.87	400	8.2	21.5	2.93	12.6	3.14	1.05	3.62	0.56	3.33	0.68	1.83	0.25	1.58	0.22	1.9	0.21
Yandong deposit	YZK6307-215	diorite porphyry	340	56.46	0.68	17.77	8.495	2.12	4.37	7.43	0.29	0.11	0.14	2.42	99.95	50.4726			7.98	12.7	8.61					6.7	469	34.1	51.3	6.89	0.295	96.7	21.4	45	5.64	23.4	5.05	1.14	5.37	0.99	6.17	1.2	3.63	0.74	3.98	0.69	2.13	0.57	17.3
Yandong deposit	YZK6307-237	diorite porphyry	340	58.98	0.77	17.87	4.88	1.39	5.95	6.69	0.84	0.12	0.19	2.42	99.91	70.7209			5.39	8.43	4.41					12.1	468	25.1	388	5.28	0.284	241	19.5	45.8	6.16	26	4.83	1.25	4.97	0.87	4.85	0.91	2.75	0.47	2.7	0.45	10.3	0.44	31.8
Yandong deposit	YZK6307-252	diorite porphyry	340	61.85	0.75	14.73	3.75	1.08	5.64	3.57	2.85	0.09	0.21	5.48	99.81	74.8711			5.25	6.54	3.98					68.7	234	25.6	388	5.02	3.23	455	19.9	46.5	6.34	25.3	5.54	1.19	4.45	0.82	4.77	0.88	2.84	0.5	2.95	0.48	10	0.42	7.6
Yandong deposit	YZK6307-206	diorite porphyry	340	64.53	0.79	15.48	4.47	1.47	2.67	5.05	2.13	0.06	0.2	3.37	99.95	54.1978			4.44	8.12	3.69					49.3	269	25.7	382	4.89	2.14	366	20.9	45	6.22	28.5	5.39	1.3	4.49	0.84	4.61	0.8	2.51	0.5	2.72	0.42	10.2	0.45	4.27
Yandong deposit	YZK6307-183	diorite porphyry	340	64.24	0.56	14.1	5.915	2.14	3.03	3.82	2.19	0.11	0.12	4.07	99.95	50.3673			6.02	13.1	4.71					52.7	222	26.2	49.1	5.54	2.85	391	15.8	34.3	4.37	18.7	4.13	1.07	3.88	0.74	4.74	0.87	2.78	0.48	2.98	0.49	2.14	0.42	4.96
Yandong deposit	YZK6307-289	diorite porphyry	340	67.37	0.52	14.69	5.27	1.96	1.57	4.52	2.56	0.09	0.11	1.64	99.96	37.1139			6.22	12.3	3.57					42.7	247	25.8	58.2	5	1.1	480	19	35.5	4.48	18.3	4.28	0.97	3.52	0.72	4.53	0.83	2.61	0.49	3.2	0.53	2.59	0.42	7.64
Yandong deposit	YD14-2	diorite porphyry	340	60.19	0.73	14.41	7.63	3.43	4.93	4.45	1.37	0.14	0.16	2.69	99.81	56.1406			44.1	30.6	47.8					17.6	772	20.5	222	4.11	1.05	339	16.1	38	4.95	20.7	4.3	1.29	4.15	0.7	4.31	0.82	2.42	0.42	2.52	0.42	6.32	0.28	12.6
Yandong deposit	YZK6307-25	porphyritic quartz diorite		67.15	0.49	14.4	5.045	1.81	2.78	3.69	2.07	0.2	0.12	2.28	99.96	52.1904			8.57	12.8	5.17					43.4	258	24.8	108	5.51	1.53	397	13.4	27.2	3.57	16.4	3.55	0.87	3.65	0.71	3.96	0.89	2.7	0.53	3.12	0.5	3.08	0.52	10.6
Yandong deposit	YZK6307-67	porphyritic quartz diorite		66.44	0.53	15.03	5.195	1.96	1.74	3.5	3.54	0.11	0.11	2.12	99.96	39.8866			6.39	12.5	4.51					77.9	208	25.6	91.4	5.62	1.97	634	13.3	29	3.75	17.1	4.18	0.91	4.03	0.78	4.73	0.91	2.88	0.52	3.27	0.53	2.97	0.6	8.32
Yandong deposit	YZK6307-79	porphyritic quartz diorite		66.15	0.41	14.36	4.47	1.69	3.32	3.75	3.32	0.11	0.09	2.54	99.95	59.5367			4.54	10.3	4.08					60.1	228	23.1	118	4.9	1.01	617	9.95	20.1	2.8	13.8	3.38	1.02	3.27	0.66	3.77	0.74	2.47	0.43	2.82	0.52	4.21	0.47	6.85
Yandong deposit	YZK6307-298	porphyritic quartz diorite		65.08	0.55	14.81	5.73	1.99	3.15	4.67	1.75	0.1	0.12	2.32	99.94	52.1314			6.96	11.9	5.24					33.8	311	29.4	78.6	6.25	0.872	348	21.8	41.2	5.23	21.8	4.18	1.02	4.35	0.92	4.95	1.04	3.26	0.65	3.48	0.54	3.63	0.63	7.56
Yandong deposit	YZK6307-317	porphyritic quartz diorite		64.6	0.51	14.44	5.395	2.26	3.04	3.51	2.04	0.09	0.1	4.24	99.92	52.7473			6.87	13.3	4.79					51	210	26.5	96.6	5.42	3.06	380	11.8	25.4	3.54	15.4	3.44	0.86	3.5	0.67	4.33	0.88	2.9	0.46	3.32	0.57	3.74	0.45	8.46
Yandong deposit	YD2-6307-4	diorite porphyry	339	60.73	0.692	14.98	6.6	0.141	2.62	3.86	2.75	2.56	0.155	4.51	99.598	44.0218	17	126	13.2	16.4	12.3	45.4	88.7	16.4		78	178	37.2	138	10.1	3.94	506	33.6	63.3	7.62	31.3	6.58	1.31	6.57	1.2	7.2	1.44	4.74	0.774	5.15	0.83	5.21	0.894	20.7
Tuwu deposit	TW-8	diorite porphyry		56.28	0.92	16.7	9.07	0.03	5.18	3.58	2.6	0.58	0.23	4.64	99.81	53.0824	19.5	194	115	28.3	98.6	384	42.4	18.9		13.3	339	12.7	102	2.6	1.72	74	7.58	16.5	2.39	11.8	2.76	0.85	2.34	0.43	2.25	0.46	1.18	0.2	1.18	0.17	2.48	0.19	5.77
Tuwu deposit	TW-4	diorite porphyry		56.98	0.94	16.41	7.18	0.07	4.53	5.79	4.15	0.83	0.3	2.77	99.95	55.553	24.3	186	64.6	18.6	52.8	13.6	55.2	16.2		21.4	965	18.4	157	3.7	3.32	96	8.74	21.6	3.24	15.3	3.63	1.32	3.6	0.65	3.85	0.7	1.9	0.29	1.72	0.24	4.21	0.51	3.74
Linglong deposit	L-1201-10	diorite porphyry		58.3	0.84	16	8.29	0.15	3.57	7.84	3.12	1.45	0.18		99.73	46.0367	22.8	195	9.7	25.5	13.2	35.5	78.9	13.8		38.9	256	21.1	100	2.87	3.44	293	8.45	17.8	2.53	12.2	3.01	0.849	3.32	0.652	3.96	0.832	2.71	0.446	2.93	0.471	3.19	0.237	6.76
Linglong deposit	L-1201-11	diorite porphyry		57.67	0.75	16.3	7.78	0.16	3.96	8.6	2.07	2.13	0.12		99.53	50.2077	27	191	65.3	24.6	32.1	66.4	74.4	13.9		55.4	195	20.9	92.3	3.32	5.37	415	11.4	22.9	3.1	14.1	3.4	1.11	3.64	0.713	4.35	0.855	2.63	0.406	2.75	0.415	3.02	0.28	3.42
Linglong deposit	L-1201-12	diorite porphyry		60.94	0.76	15.75	7.58	0.13	3.32	6.52	2.7	1.76	0.14		99.6	46.4577	20.3	167	19.2	17.9	14.1	42.7	77.7	13.9		46.4	228	25.5	107	3.45	4.65	345	11.4	23	3.12	14.4	3.79	1.47	3.97	0.806	4.96	0.971	3.04	0.454	2.87	0.447	3.41	0.28	38.9
Linglong deposit	L-1201-13	diorite porphyry		57.51	1.4	14.82	9.45	0.21	3.1	9.1	1.37	2.17	0.46		99.6	39.3889	22.7	185	28.4	29.3	38	67.8	102	19.4		52.8	231	40.2	266	8.2	3.75	475	26.5	56	7.53	34.4	7.93	1.54	7.98	1.42	8.2	1.59	4.8	0.724	4.64	0.717	7.3	0.577	35.1
Yandong deposit	YD13-47	plagiogranite porphyry	339	68.9	0.2	15.2	0.96	0.03	0.85	2.49	6.21	1.19	0.09	3.39	99.5	63.6897			9	1.7	6.3					24	584	6	28.6	1.7	1.28	280	10.4	20.5	2.39	8.3	1.51	0.5	1.26	0.18	1	0.2	0.54	0.08	0.56	0.09	0.7	0.12
Yandong deposit	YD13-114	plagiogranite porphyry	339	64.9	0.29	15.2	2.98	0.08	1.25	3.67	3.49	2.62	0.11	4.58	99.2	45.3842			10	7.7	7.3					42.9	307	6.5	43	2.8	3.02	550	7.9	17.8	2.19	8.2	1.68	0.48	1.49	0.21	1.2	0.24	0.66	0.1	0.68	0.11	1.2	0.23
Yandong deposit	YX13-25	plagiogranite porphyry	339	65.8	0.29	14.6	2.99	0.19	1.57	3.67	4.3	1.4	0.11	3.32	98.2	50.9854			10	9.6	8.2					28.2	549	7.5	43.9	2.7	3.1	400	9	19.8	2.48	9.3	1.86	0.58	1.67	0.23	1.34	0.26	0.71	0.1	0.71	0.11	1.3	0.23
Tuwu deposit	TW13-42	plagiogranite porphyry	339	65.1	0.31	15.9	3.23	0.03	1.11	3.17	2.92	1.77	0.14	4.61	98.3	40.5041			7	6.5	4					33.8	511	4.8	36.3	2.3	3.44	350	7.3	16.5	2.17	8.4	1.73	0.52	1.5	0.19	0.98	0.19	0.55	0.08	0.64	0.11	1.1	0.17
Fuxing deposit	FX01	granitic porphyry	335	74.52	0.14	14.46	0.55	0.03	0.47	1.36	5.47	1.08	0.08	1.77	99.94	62.8651		23.29	2.85	1.31	4.1			9.25		34.45	346.5	6.07	44.16	2.02	0.79	231.3	9.61	18.72	2.13	8.22	1.43	0.51	1.22	0.17	0.94	0.21	0.61	0.1	0.68	0.12	1.56	0.56	156.6
Fuxing deposit	FX02	granitic porphyry	335	72.91	0.16	15.09	0.55	0.03	0.56	1.45	6.09	1.13	0.09	1.88	99.93	66.8551		23.63	3.16	1.23	2.51			10.22		17.3	347.8	6.04	49.91	2.37	0.69	284.8	9.67	18.59	2.09	8.12	1.38	0.51	1.19	0.17	0.96	0.22	0.64	0.11	0.74	0.13	1.36	0.61	43.6
Fuxing deposit	FX05	granitic porphyry	335	72.61	0.23	16.57	1.09	0.01	0.38	0.36	3.68	2.68	0.08	2.22	99.91	40.8507		32.76	4.78	0.79	2.4			15.39		40.04	326.4	2.89	62.57	2.51	2.57	470.7	9.11	19.02	2.11	8.33	1.35	0.48	1.02	0.12	0.51	0.1	0.34	0.06	0.41	0.08	2.6	2.42	30.84
Fuxing deposit	15FX-90	plagiogranite porphyry	332	73.64	0.22	14.6	1.05	0.01	0.48	0.81	0.52	4.14	0.04	3.96	99.47	47.5235	3.16	38	2.49	0.52	1.01	22.6	14.5	13.9		65.8	191	2.4	23.9	3.23	1.52	669	3.28	5.91	0.695	2.6	0.43	0.174	0.344	0.064	0.363	0.055	0.269	0.017	0.169	0.081	1.09	0.187	4.19
Fuxing deposit	15FX-91	plagiogranite porphyry	332	74.22	0.24	14.71	0.83	0.01	0.57	0.72	0.47	4.23	0.04	3.42	99.47	57.6355	3.1	37.1	2.29	0.468	0.998	37.3	11.9	12.6		62.9	123	3.41	21.6	3.69	1.51	796	6.92	12.8	1.41	5.36	0.786	0.238	0.464	0.064	0.475	0.108	0.403	0.042	0.396	0.046	0.929	0.2	1.56
Fuxing deposit	15FX-92	plagiogranite porphyry	332	70.69	0.5	16.32	0.94	0.01	0.53	1.2	0.4	4.74	0.04	4.06	99.44	52.7626	10.3	74.8	34.2	0.507	1.54	71.4	14.3	14.8		67	118	3.72	44.8	5.68	1.34	1054	7.16	14	1.67	6.91	1.22	0.29	0.899	0.134	0.594	0.116	0.412	0.068	0.736	0.095	1.52	0.286	1.96
Fuxing deposit	15FX-94	plagiogranite porphyry	332	72.39	0.24	15.17	0.91	0.01	0.52	1.58	0.38	4.37	0.07	3.76	99.4	53.0961	3.41	50	3.36	0.465	1.35	61.1	15.3	15.3		67	257	2.55	24.4	2.62	1.79	779	8.56	15.4	1.86	7.05	1.17	0.374	0.799	0.127	0.459	0.088	0.267	0.024	0.317	0.049	0.945	0.202	5.47
Fuxing deposit	FX-2002-2	plagiogranite porphyry	332	70.47	0.16	12.3	1.11	0.09	0.96	5.07	4.25	1.05	0.08	4.03	99.57	63.1449	2.92	23.1	3.28	2.95	11.5	325	41	8.98		26.2	392	7.71	21.4	1.99	2.19	159	8.02	15.5	2.03	9.07	1.72	0.696	1.55	0.252	1.33	0.241	0.747	0.106	0.671	0.108	0.929	0.237	9.79
Fuxing deposit	FX-2002-3	plagiogranite porphyry	332	74.89	0.16	10.26	1.86	0.1	0.55	4.88	0.38	2.36	0.08	4.11	99.64	36.9399	1.94	16.4	2.61	4.24	5.97	2641	595	8.58		43	219	5.87	21.2	1.75	2.36	418	5.14	10.5	1.33	5.87	1.19	0.513	1.08	0.191	1.06	0.21	0.675	0.101	0.717	0.11	0.722	0.101	10.6
Yandong deposit	YZK6307-610	plagiogranite porphyry	332	68.84	0.25	15.76	2.195	1.11	2.59	4.27	2.18	0.04	0.1	2.72	99.94	70.0377			9.67	3.43	7.03					36.7	429	7.35	57.1	2.68	3.47	466	9.3	19.1	2.29	9	1.66	0.71	1.44	0.2	1.31	0.21	0.69	0.16	0.82	0.13	1.61	0.27	5.61
Yandong deposit	YZK6307-270	plagiogranite porphyry	332	71.5	0.19	14.65	0.859	0.499	3	4.4	1.44	0.05	0.08	3.31	99.95	87.3716			4.64	1.06	2.32					27.3	264	6.54	28.4	2.63	2.4	315	12	23.3	2.93	10.4	1.58	0.51	1.46	0.2	1.1	0.22	0.64	0.11	0.73	0.12	1.15	0.33	7.87
Yandong deposit	YZK6307-688	plagiogranite porphyry	332	69.75	0.18	15.5	2.29	0.577	3.06	4.04	1.6	0.04	0.12	2.77	99.9	72.5813			5.52	5.89	3.31					25.6	661	5.8	39.4	2.6	1.79	487	10.7	21	2.64	10.1	1.42	0.78	1.19	0.21	1.2	0.19	0.59	0.12	0.64	0.09	1.26	0.25	5.3
Yandong deposit	YD-6	tonalite	335	65.21	0.299	14.51	3.25	0.112	1.49	4.22	3.73	1.89	0.114	4.86	99.685	47.5954	7	59.8	10.7	8.48	9.5	15.6	131	14.5		39.7	352	8.31	76.9	2.58	3.92	371	11	23	2.93	11.6	2.27	0.659	1.92	0.283	1.65	0.288	0.807	0.128	0.807	0.125	2.11	0.339	8.91
Yandong deposit	YD-5504-99-3	tonalite	335	65.74	0.379	16.32	4.5	0.05	1.42	1.81	0.735	2.89	0.123	6.01	99.977	38.4663	10.6	86.9	12.7	10.6	9.54	456	53.1	17.4		55.8	283	13.5	92.9	2.54	1.91	388	14.4	31.4	4.12	17.7	3.99	1.24	3.58	0.574	2.87	0.486	1.26	0.194	1.18	0.17	2.57	0.308	4.53
Yandong deposit	YD-5501-98-1	tonalite	335	66.79	0.366	16.32	5.6	0.02	0.52	0.683	0.616	3.49	0.139	4.87	99.414	15.5372	8.37	84.4	13.7	16.7	10.3	1839	21.8	19.1		61.8	184	9.36	83.2	2.81	2.18	423	14.1	26.8	3.48	14.7	2.77	0.682	2.06	0.339	1.54	0.306	0.888	0.151	0.963	0.143	2.44	0.242	5.03
Yandong deposit	YD-7	tonalite	335	69	0.301	15.48	3.14	0.07	1.36	0.927	4.58	1.97	0.118	2.98	99.926	46.1795	7.84	60	7.97	7.87	7.52	36.1	240	14.8		38.8	285	6.8	83.7	2.71	2.87	423	8.35	18.3	2.36	9.47	1.86	0.461	1.55	0.234	1.39	0.248	0.759	0.129	0.768	0.13	2.22	0.426	7.96
Yandong deposit	YD-3104-244-8	tonalite	335	70.38	0.194	14.49	5.53	0.009	0.299	0.455	0.431	3.86	0.069	4.16	99.877	9.6749	5.12	27.3	4.36	21.8	4.16	454	4.82	11.9		57	129	4.71	39.3	2.19	1.23	614	7.66	15.3	1.85	7.4	1.32	0.408	1.01	0.157	0.905	0.173	0.464	0.085	0.562	0.091	1.22	0.285	1.4
Yandong deposit	YD2-6307-25	tonalite	335	64.52	0.343	15.41	3.87	0.062	2.31	3.82	3.32	1.85	0.128	3.94	99.573	54.1805	7.59	70.6	51.8	11.3	45	1532	44	15.3		37.8	447	10.8	41.2	3.64	2.82	476	17.8	34	4.16	16.9	2.94	1.05	2.36	0.388	2.11	0.387	1.15	0.179	1.19	0.177	1.39	0.331	4.33
Yandong deposit	YD-005-969-22	tonalite	335	66.65	0.175	11.98	2.19	0.017	0.789	8.47	0.613	2.83	0.121	5.56	99.395	41.6472	4.99	13.1	3.12	4.77	4.36	3253	32.2	11.7		36.7	1128	13.9	24.2	2.41	2.01	511	58.4	108	11.7	38.5	5.55	1.47	3.86	0.584	3.01	0.527	1.47	0.229	1.46	0.188	0.779	0.278	12.3
Yandong deposit	YD2-6307-29	tonalite	335	66.79	0.329	15.49	2.72	0.053	1.4	3.37	3.93	2.13	0.114	3.32	99.646	50.4865	6.08	49.3	17.4	5.77	15.4	132	35	15.2		43.5	437	10.5	52.4	4.43	4.14	638	12.8	25.8	3.23	13.3	2.36	0.647	2.14	0.354	2.07	0.393	1.21	0.201	1.32	0.206	1.79	0.433	9.09
Yandong deposit	YD2-6307-24	tonalite	335	66.91	0.302	15.07	3.01	0.06	1.17	3.98	0.965	3.37	0.115	4.62	99.572	43.504	5.84	51.1	33.8	6.76	30.6	924	56.7	14.6		65.6	349	10.2	37.1	3.58	4.66	878	15.1	29.7	3.69	14.8	2.68	0.84	2.25	0.371	1.96	0.366	1.09	0.161	1.1	0.165	1.25	0.32	11
Yandong deposit	YD2-6307-23	tonalite	335	68.56	0.209	14.76	1.58	0.06	0.478	4.65	1.44	2.99	0.081	4.93	99.738	37.4736	2.99	27.1	5.7	2.96	9.07	1149	28.2	12.5		64.7	532	7.76	23.2	3.02	4.87	655	13.4	25.2	2.99	12.2	2.13	0.725	1.7	0.277	1.49	0.273	0.816	0.128	0.837	0.123	0.863	0.317	13.5
Yandong deposit	YD2-6307-13	tonalite	335	71.62	0.229	14.83	3.96	0.023	0.583	0.621	0.219	4.17	0.109	3.31	99.674	22.5798	3.56	31.7	4.65	14	8.39	4996	18.9	13.9		68.3	119	4.57	36	2.47	2.22	838	14.3	25.6	2.95	11.4	1.85	0.658	1.48	0.196	0.993	0.175	0.545	0.091	0.648	0.108	1.3	0.222	2.73
Tuwu deposit	TW28a	plagiogranite porphyry		70.7	0.28	15.6	1.4	0.02	1.06	0.9	7.36	0.94	0.11	2.04	100.3	59.9988			6.2	3.7	12					5.2	279	4.96	156	3.2	0.5	109	8.91	16.5	2.56	10.84	1.59	0.66	1.29	0.3	0.98	0.2	0.58	0.1	0.65	0.1	3.3	0.7
Tuwu deposit	Btw38a	plagiogranite porphyry		64.3	0.47	17.7	4.42	0.04	2.2	2.3	4.6	1.93	0.2	1.56	99.8	49.6484										28.1	405	7.9	100	2.7		394	10.3	18.6		10.1	2.3	0.75	1.96	0.28					0.84	0.14	1.75	0.19
Tuwu deposit	Btw92a	plagiogranite porphyry		71.8	0.1	14.8	2.14	0.04	0.7	0.3	5.2	1.32	0.09	2.8	99.3	39.3205										16.1	226	6.7	69.9	3.9		341	12.7	22.5		9.73	1.75	0.56	1.75	0.29					0.87	0.15	2.55	0.26
Tuwu deposit	T-4fa	plagiogranite porphyry		65.3	0.26	15.4	2.79	0.09	0.73	5.62	1.74	1.39	0.13	6.37	99.9	34.1384																	8.55	17.7	2.36	9.61	1.76	0.47	1.34	0.2	1.12	0.23	0.67	0.11	0.72	0.12
Tuwu deposit	T-71fa	plagiogranite porphyry		69.4	0.71	15.7	1.34	0.11	0.55	2.77	4.15	2.11	0.13	3.22	100.1	44.8462																	14.46	22.8	2.69	9.35	1.78	0.52	1.47	0.22	1.26	0.25	0.74	0.12	0.79	0.13
Tuwu deposit	R-1ga	plagiogranite porphyry		72.3	0.21	12.3	3.32	0.11	1.33	1.45	3.42	1.91	0.11	2	98.5	44.2464																	5.17	10.5	1.04	4.19	0.85	0.38	0.86	0.13	0.7	0.14	0.38	0.06	0.38	0.07
Tuwu deposit	R-2a	plagiogranite porphyry		67.5	0.24	14.8	2.78	0.08	0.75	3.4	4.21	0.97	0.12	5.06	99.9	34.8301																	8.79	16.7	1.97	9.21	1.34	0.62	1.54	0.25	1.19	0.23	0.75	0.1	0.67	0.11
Tuwu deposit	TZK002-315b	plagiogranite porphyry		68.7	0.27	16.3	1.78	0.03	0.46	3.38	3.71	1.8	0.14	3.33	99.9	33.8604										28.8	397	7.2	55.2	2.38	3.47	395	10.1	19.7	2.48	9.63	1.69	0.73	1.46	0.23	1.08	0.26	0.67	0.12	0.82	0.13	1.66	0.2
Tuwu deposit	TZK002-378b	plagiogranite porphyry		68.7	0.25	14.8	2.16	0.04	0.64	4.06	4.25	1.38	0.12	3.58	100.1	36.987										25	462	8.47	49.3	2.58	1.38	245	12.9	25.8	3.14	11.2	2.17	0.72	1.89	0.26	1.43	0.29	0.81	0.14	0.94	0.16	1.74	0.25
Tuwu deposit	TZK002-394b	plagiogranite porphyry		67.5	0.23	14.2	2.57	0.07	1.14	4.34	4.97	1.22	0.1	3.76	100.1	46.773										23.5	586	9.45	46.3	2.26	1.28	271	13.7	27.6	2.88	11.7	2.38	0.89	1.82	0.3	1.49	0.28	0.86	0.14	1.06	0.14	1.3	0.22
Yandong deposit	YD203e	plagiogranite porphyry		70.1	0.27	15.6	2.28	0.03	0.93	2.05	5.6	1.22	0.08	1.78	99.9	44.6919			45.9		34.2					17	738	8.94	37.4	1.44	1.9	786	6.28	14.4	1.93	8.58	2.04	0.78	2.07	0.29	1.7	0.34	0.96	0.13	0.85	0.11	1.06	0.16
Yandong deposit	YD-34e	plagiogranite porphyry		68.8	0.38	15.9	3.78	0.02	1.24	1.01	2.98	2.35	0.21	2.93	99.6	39.3889			184		109					9.8	347	13.3	73.8	2.74	1.2	605	6.73	16.4	2.25	10.5	2.6	1.01	2.88	0.41	2.38	0.49	1.38	0.19	1.27	0.2	1.89	0.21
Tuwu deposit	TW208e	plagiogranite porphyry		68.2	0.37	17.1	3.06	0.03	1.35	1.56	4.89	2	0.12	1.52	100.2	46.6378			15.7		2.7					46.6	619	6.17	41.9	3.15	3.57	1483	11.4	23.5	2.78	11	1.93	0.81	1.6	0.2	1.11	0.21	0.59	0.08	0.59	0.08	1.23	0.32
Tuwu deposit	TW203e	plagiogranite porphyry		70.3	0.26	16.2	2.24	0.02	0.92	1.1	5.24	2.05	0.08	1.68	100.1	44.8622			15.7		2.63					35	347	4.42	15.6	2.72	2.43	850	7.38	15.1	1.79	6.83	1.21	0.59	1.05	0.13	0.83	0.15	0.44	0.06	0.41	0.05	0.59	0.44
Tuwu deposit	TW306e	plagiogranite porphyry		70.6	0.29	17	1.74	0.02	0.97	1.11	4.73	2.14	0.06	1.41	100.1	52.4798			16.6		6.8					21.8	714	5.23	37	2.21	1.21	586	7.71	15.5	1.83	7.19	1.27	0.6	1.19	0.16	0.92	0.18	0.51	0.07	0.48	0.07	1.09	0.12
Tuwu deposit	TW18e	plagiogranite porphyry		64.9	1.23	16.4	4.75	0.14	2.16	3.49	3.35	1.78	0.55	0.91	99.7	47.3919			111		79.9					18.5	920	16	146	8.39	1.18	554	16.5	36.1	4.44	18.8	3.86	1.28	3.8	0.5	2.82	0.57	1.58	0.21	1.4	0.21	3.53	0.56
Tuwu deposit	RY-le	plagiogranite porphyry		72.3	0.21	14.5	3.32	0.11	1.33	1.45	3.42	1.91	0.11	1	99.7	44.2464												3.39					5.17	10.5	1.04	4.19	0.85	0.38	0.86	0.13	0.7	0.14	0.38	0.06	0.38	0.07
Tuwu deposit	RY-2e	plagiogranite porphyry		67.5	0.24	14.8	3.78	0.08	1.25	3.4	4.21	1.97	0.12	2.06	99.4	39.5808												5.94					8.79	16.7	1.97	9.21	1.34	0.62	1.54	0.25	1.19	0.23	0.75	0.1	0.67	0.11
Tuwu deposit	TW-33e	plagiogranite porphyry		69.8	0.4	15.9	2.27	0.03	1.28	1.22	4.93	1.56	0.3	2.3	99.9	52.7647			17.9		12.8					11.5	421	6.3	86.7	2.18	0.46	458	7.33	15.2	1.77	6.86	1.39	0.54	1.25	0.19	1.06	0.22	0.65	0.11	0.7	0.12	2.29	0.21
Tuwu deposit	TW-35e	plagiogranite porphyry		73.1	0.34	14.2	2.89	0.02	1.17	0.3	3.45	1.13	0.37	2.5	99.5	44.5064			11.9		8.14					23	397	6.03	74.3	3.05	1.01	272	9.94	20.1	2.33	8.69	1.45	0.42	1.1	0.17	0.92	0.19	0.6	0.09	0.69	0.11	2	0.28
Tuwu deposit	TW4803-11a	tonalite	335	68.21	0.292	15.68	3.35	0.037	1.2	2.47	4.65	1.28	0.128	2.38	99.68	41.5076	4.75	43.1	6.84	26.8	5.33	95.7	39.2	10.9		27.3	509	8	38.1	2.25	1.73	281	11.1	22.2	2.73	10.9	2.07	0.67	1.68	0.271	1.49	0.283	0.881	0.126	0.87	0.124	1.3	0.196	18.3
Tuwu deposit	TW4803-15a	tonalite	335	66.38	0.325	16.83	4.04	0.032	1.45	1.67	3	2.49	0.134	3.26	99.61	41.5552	5.14	19.7	6.48	21.9	6.46	97.3	26.8	13.3		53.6	559	8.72	45.2	2.36	4.29	440	14.1	27.4	3.31	13.7	2.47	0.782	1.89	0.308	1.69	0.315	0.942	0.15	1	0.151	1.65	0.222	4.54
Tuwu deposit	TW-19a	tonalite	335	67.97	0.31	15.64	3.85	0.034	1.3	1.74	3.4	2.4	0.136	2.87	99.65	40.081	4.51	27.7	6.66	31.1	10.2	356	162	11.4		56.3	261	7.51	43	2.49	3.31	433	10.9	22.5	2.42	11.2	1.95	0.621	1.55	0.258	1.43	0.271	0.874	0.136	0.843	0.134	1.5	0.223	15.5
Tuwu deposit	TW-21a	tonalite	335	65.34	0.359	16.13	5.05	0.043	1.68	2.22	2.98	2.09	0.152	3.61	99.65	39.7241	7.11	68.8	8.83	21.5	6.74	204	34.2	16.7		49.1	566	9.53	53.6	2.41	3.04	461	14.8	29.3	3.73	15.3	2.71	0.878	2.23	0.35	1.96	0.362	1.1	0.164	1.15	0.176	1.82	0.203	5
Tuwu deposit	TW-33a	tonalite	335	66.74	0.313	15.53	4.71	0.043	1.38	2.31	3.64	1.61	0.145	3.24	99.66	36.7261	4.7	46.5	31.7	28.4	6.62	249	28.2	13.4		32.5	608	8.08	43.6	2.33	2.22	339	13.4	26.5	3.35	13.6	2.47	0.674	1.98	0.306	1.63	0.293	0.9	0.136	0.884	0.134	1.51	0.186	5.52
Tuwu deposit	TW-35a	tonalite	335	66.89	0.306	15.7	4.61	0.045	1.29	2.53	3.15	1.85	0.14	3.12	99.63	35.6643	4.76	52.6	6.39	26.2	4.37	1102	71.5	13.8		39.5	669	8.18	41.5	2.18	2.64	426	10.7	21.6	2.7	11.6	2.15	0.737	1.88	0.305	1.71	0.307	0.945	0.142	0.931	0.139	1.52	0.194	8.79
Tuwu deposit	TW208b	tonalite	335	68.21	0.37	17.08	1.843	0.03	1.35	1.56	4.89	2	0.12	2.52	99.86	59.2022			15.7	6.1	2.7					46.6	619	6.17	41.9	3.15	3.57	1483	11.4	23.5	2.8	11	1.93	0.808	1.6	0.199	1.11	0.211	0.59	0.08	0.59	0.08	1.23	0.321
Tuwu deposit	TW203b	tonalite	335	70.32	0.26	16.15	1.436	0.02	0.82	1.1	5.24	2.05	0.08	2.47	99.87	53.0788			15.7	3	2.63					35	347	4.42	15.6	2.72	2.43	850	7.4	15.1	1.8	6.8	1.21	0.594	1.05	0.13	0.83	0.149	0.44	0.06	0.41	0.05	0.59	0.441
Tuwu deposit	TW-702	tonalite	335	67.35	0.44	14.42	2.5	0.03	1.5	3.14	4.33	1.89	0.15	4.05	99.8	54.3091	7.18	60.3	4.59	5.92	17.1	7437	35.2	11.7		33.2	290	7.73	33.4	1.98	2.03	82.8	7.83	16.9	2.26	9.66	2.02	0.7	1.77	0.3	1.61	0.29	0.79	0.12	0.75	0.12	0.94	0.23	4.59
Tuwu deposit	TW4803-14	tonalite	335	65.71	0.3	15.24	5.99	0.04	1.33	1.8	1.67	3.09	0.15	4.33	99.65	30.5489	5.19	31.8	6.6	23	6.97	116	35.7	14.4		69.8	416	8.7	44.9	2.3	4.25	553	11.8	23.3	2.86	11.8	2.15	0.71	1.85	0.3	1.66	0.29	0.93	0.13	0.91	0.14	1.59	0.21	14.2
Tuwu deposit	TW32	tonalite	335	64.58	1.02	19.03	2.43	0.03	3.9	0.69	2.75	0.87	0.29	4.25	99.84	76.0733	19.3	165	132	5.33	64.7	659	37.3	14.4		19.4	381	13.4	88.7	3.27	1.31	55.1	7.19	17.2	2.59	11.7	2.68	0.74	2.6	0.46	2.57	0.51	1.41	0.23	1.53	0.23	2.48	0.24	3.87
Fuxing deposit	15FX-89	monzogranite	328	77.41	0.21	12.04	2.21	0.01	0.36	0.59	0.89	3.3	0.06	2.57	99.66	24.3972	2.55	35.5	2.89	0.23	1.1	37	10	11.8		46.1	208	1.86	20.9	1.75	0.75	687	6.19	11.9	1.44	5.76	0.909	0.329	0.619	0.069	0.343	0.062	0.209	0.036	0.253	0.041	0.75	0.156	3
Fuxing deposit	FX-6	monzogranite	328	74.83	0.25	13.32	1.41	0.01	0.35	2.01	0.43	3.76	0.14	3.16	99.66	32.9645	3.7	37.3	2.99	0.345	2.02	27.5	10.8	12.7		45.9	99.3	2.51	22.4	1.85	0.662	722	6.9	13.8	1.75	7.23	1.25	0.455	0.823	0.112	0.498	0.089	0.29	0.051	0.342	0.059	0.747	0.154	1.92
Fuxing deposit	FX-7	monzogranite	328	79	0.22	11.38	0.98	0.02	0.39	1.13	0.36	3.14	0.03	3.11	99.76	44.0832	2.71	30.4	3	0.346	1.35	32.5	10	11.1		46.3	60.6	2.61	30.9	1.99	0.657	692	5.27	10.7	1.33	5.56	0.951	0.359	0.727	0.107	0.491	0.098	0.323	0.052	0.368	0.063	1.09	0.151	1.55
Yandong deposit	YD2-6307-19	quartz porphyry	328	73.76	0.4	13.45	3.88	0.031	0.355	0.754	0.422	3.41	0.042	3.14	99.644	15.3442	10.3	17.8	2.49	7.5	4.45	1741	25.9	20.2		57.5	72.8	24.8	439	11.5	1.74	408	32.8	76.1	9.68	42.5	8.7	1.28	6.41	0.942	4.84	0.966	3.31	0.576	4.16	0.742	12.4	0.922	5.18
Yandong deposit	YD2-6307-9	quartz porphyry	328	74.29	0.454	15.21	2.32	0.022	0.533	0.35	0.636	3.49	0.044	2.31	99.659	31.2774	10.7	19.4	3.49	3.27	4.81	940	59.7	19.7		66.3	171	23.7	524	13.7	2.24	510	29.2	66.8	8.73	38.3	7.03	1.22	5.25	0.826	4.54	0.948	3.37	0.622	4.6	0.823	14.8	1.12	6.07
Yandong deposit	YD2-6307-11	quartz porphyry	328	75.08	0.401	13.49	3.18	0.011	0.388	0.729	0.3	3.48	0.057	2.57	99.686	19.466	11.1	23.2	2.37	9.35	4.86	3727	12.7	22.5		58.7	121	27.8	475	11.3	1.83	406	42.9	70.1	11.9	51.5	10.3	1.5	7.59	1.06	5.28	1.08	3.88	0.688	5.22	0.911	13.5	0.923	4.39
Yandong deposit	YD-15	quartz porphyry	328	76.47	0.09	11.03	1.39	0.082	0.861	2.23	2.92	1.65	0.037	3	99.76	55.0986	5.61	3.12	3.83	0.955	2.61	5.44	34.9	11.7		38.2	329	20.3	87.3	5.51	2.5	420	15.7	30.6	3.84	13.9	2.89	0.302	2.74	0.544	3.57	0.685	2.24	0.371	2.51	0.408	3.36	0.642	5.97
Yandong deposit	YD-14	quartz porphyry	328	77.34	0.094	12.34	1.48	0.049	1.01	0.721	3.12	1.73	0.04	1.99	99.914	57.4816	5.52	2.63	2.73	0.796	1.64	8.39	33.5	11.7		37.7	332	21.1	85.4	5.97	2.73	416	16.8	32.4	3.76	13.5	2.89	0.329	2.76	0.567	3.66	0.724	2.23	0.382	2.6	0.406	3.38	0.631	5.23
Yandong deposit	YD13-1-1	quartz albite porphyry	323	76.3	0.09	12.5	1.39	0.08	0.56	2.07	3.42	1.28	0.03	1.26	99	44.3862			15	0.7	0.6					28	853	22.3	51	6.6	1.33	650	16	33.7	3.89	13.1	2.92	0.33	3.04	0.55	3.57	0.78	2.36	0.35	2.58	0.39	2.2	0.56
Yandong deposit	YD13-1-2	quartz albite porphyry	323	75.7	0.09	12.9	1.54	0.09	0.6	1.92	3.49	1.32	0.03	1.44	99.1	43.5612			13	1.3	1.3					29.1	839	23.5	51.8	6.8	1.41	610	16.6	34.5	3.92	13.2	2.95	0.36	3.25	0.59	3.77	0.82	2.52	0.37	2.69	0.4	2.2	0.56
Yandong deposit	YD13-140	quartz albite porphyry	323	76	0.08	12.2	1.38	0.08	0.47	2.08	4.35	1.1	0.03	1.58	99.3	40.2878			10	0.8	0.9					25.6	598	22.1	50.4	6.6	1.23	490	13.9	29.9	3.43	11.4	2.6	0.36	2.91	0.53	3.57	0.8	2.39	0.36	2.6	0.38	2.1	0.55
Yandong deposit	YD13-145	quartz albite porphyry	323	65.5	0.12	17.2	1.82	0.08	0.47	6.15	2.45	2.54	0.04	2.48	98.9	33.8443			10	1.1	0.6					39.3	739	20.1	66.1	9.2	1.3	670	17.1	38.2	4.03	13.5	3.04	0.4	3.25	0.59	3.87	0.82	2.43	0.38	2.85	0.43	2.9	0.77
Linglong deposit	L-1201-2	quartz albite porphyry	319	75.18	0.17	12.94	1.96	0.1	0.58	3.26	3.72	1.7	0.07		99.68	36.9572	4.88	14.2	6.95	1.99	5.64	7.02	22.7	12		45.5	239	25.9	90.5	7.3	2.45	375	23.5	43	5.05	18.9	3.84	0.649	3.79	0.75	4.69	0.978	3.26	0.543	3.67	0.573	3.81	0.704	8.72
Linglong deposit	L-1201-3	quartz albite porphyry	319	75.12	0.22	14.22	1.84	0.06	0.61	1.9	3.13	2.49	0.08		99.66	39.6411	4.94	16.5	5.5	2.28	3.91	8.48	23.6	13.8		62.5	153	22.3	98.1	7.2	3.31	453	18.6	35.5	4.12	16.2	3.55	0.559	3.29	0.682	4.14	0.854	2.9	0.497	3.31	0.553	3.93	0.69	9.67
Linglong deposit	L-1201-4	quartz albite porphyry	319	76.39	0.17	12.89	1.87	0.07	0.55	2.38	3.26	2.02	0.06		99.68	36.8151	4.64	12.8	3.02	1.71	3.84	7.15	20.2	11.9		54.9	198	23.2	89.2	6.89	2.82	445	17.4	33.3	3.97	15.5	3.37	0.576	3.33	0.679	4.27	0.9	3.03	0.52	3.51	0.569	3.75	0.68	11.7
Linglong deposit	L-1201-6	quartz albite porphyry	319	77.89	0.14	11.29	1.73	0.08	0.47	3.25	2.93	1.83	0.05		99.66	34.989	3.57	18.3	17.7	2.04	5.68	7.99	43.7	11.5		49.9	180	22	72	5.7	2.73	389	26.6	48.2	5.46	21.5	4.04	0.611	3.84	0.706	4.2	0.83	2.66	0.437	2.98	0.46	2.98	0.528	27.6
Linglong deposit	L-1201-5	quartz albite porphyry	319	74.82	0.17	13.49	1.97	0.09	0.62	3.12	3.2	2.07	0.05		99.6	38.4036	4.64	13.7	9.33	2.37	4.95	10.9	28	13.3		53.5	200	21	83.2	7.12	3.05	409	22.8	42.2	4.99	19.1	3.94	0.529	3.54	0.701	4.09	0.802	2.69	0.464	3.26	0.52	3.65	0.711	12.9
Chihu deposit	CH001-16	granodiorite	320	63.27	0.85	16.01	4.48	0.08	2.65	3.79	4.89	1.32	0.2	2.12	99.65	53.9556	20.2	131	105	19.8	40.9	1359	239	13.5		65.3	566	22	182	5.15	1.83	176	18.4	36.8	4.78	20.8	4.62	1.26	4.3	0.78	4.37	0.845	2.63	0.409	2.55	0.402	5.17	0.411	29.2
Chihu deposit	CH-15	granodiorite	320	66.66	0.58	11.77	6.35	0.05	2.64	3.28	2.31	1.3	0.16	4.53	99.64	45.1638	13.7	108	173	13.7	138	1571	150	18.8		57.9	149	14	154	6.31	4.19	268	14.8	30.6	3.98	17	3.63	0.783	3.3	0.546	2.85	0.55	1.63	0.252	1.69	0.265	4.45	0.444	17.7
Chihu deposit	CH001-14	granodiorite	320	67.08	0.73	14.64	3.52	0.08	1.71	3.88	4.24	1.8	0.18	1.82	99.68	49.0414	17	119	92.2	13.5	27.5	803	131	12.2		73.9	523	20.8	153	4.09	1.72	273	15.5	31	4.17	19.4	4.26	1.16	4.1	0.725	4.22	0.789	2.39	0.357	2.3	0.353	4.44	0.33	32.2
Chihu deposit	CH-14	granodiorite	320	67.21	0.72	14.48	4.37	0.03	1.97	1.92	4.7	1.36	0.16	2.8	99.72	47.1753	13.7	113	187	9.99	114	484	136	14.3		53.1	207	12.1	166	4.56	1.77	288	18	36.6	4.68	19.7	3.83	0.866	3.03	0.506	2.64	0.496	1.59	0.25	1.61	0.259	4.7	0.368	19.6
Chihu deposit	CH001-15	granodiorite	320	67.7	0.69	13.35	5.3	0.08	2.27	2.81	3.63	1.7	0.19	1.96	99.68	45.9015	14.6	117	87.1	20.5	40.6	1981	259	11.7		65.4	437	20.2	145	3.65	1.9	258	11	22.6	3.03	13.4	3.09	0.946	3.19	0.62	3.78	0.784	2.42	0.372	2.28	0.368	4.11	0.315	44.4
Chihu deposit	CH-21	granodiorite	320	70.04	0.39	14.95	3.81	0.08	1.68	0.48	4.07	1.76	0.11	2.3	99.67	46.6247	9.34	77.5	9.83	31.8	59	1910	230	13.3		52.5	436	18.5	59.3	3.5	1.87	508	14.7	24.1	3.4	14.2	3.17	1.03	3.85	0.661	3.74	0.694	2.09	0.313	1.92	0.303	2.23	0.363	16.8
Chihu deposit	CHOO 1-6	granodiorite	320	71.25	0.27	13.92	2.3	0.02	1.3	3.06	3.89	0.93	0.09	2.7	99.73	52.8239	5.81	43.5	4.83	8.31	5.1	664	41.4	12.8		28.2	288	13.6	67.7	3.47	2.24	169	17.6	34.4	4.24	16.9	3.16	0.721	2.69	0.485	2.74	0.513	1.65	0.276	1.89	0.322	2.44	0.329	14.7
Chihu deposit	CHOO 1-5	porphyritic granodiorite	315	71.98	0.28	13.71	3.12	0.02	0.91	1.57	4.61	1.25	0.08	2.14	99.66	36.6207	5.29	40.9	4.51	7.02	3.46	918	45.4	10.6		26.9	289	8.89	61	2.89	1.62	449	11.9	22.8	2.69	10.7	1.89	0.521	1.73	0.287	1.6	0.315	1.09	0.173	1.24	0.206	2.26	0.276	15.2
Chihu deposit	CHOO 1-4	porphyritic granodiorite	315	72.28	0.3	13.11	2.96	0.02	1.08	2.17	4.57	1.02	0.1	2.07	99.68	41.9553	5.25	37.8	5.26	7.75	4.36	885	51.4	11.9		23.7	329	11.7	58	3.91	1.54	372	15.6	29.7	3.61	14.1	2.58	0.616	2.33	0.399	2.21	0.445	1.36	0.232	1.49	0.241	2.11	0.34	18.8
Chihu deposit	CHOO 1-3	porphyritic granodiorite	315	72.63	0.28	13.31	3.14	0.02	1.03	1.36	4.35	1.18	0.07	2.28	99.64	39.3877	5.07	36.5	4.18	6.42	3.67	1012	53.2	10.8		25.8	288	7.79	53.1	3.27	1.62	410	10.5	19.1	2.31	8.98	1.66	0.48	1.46	0.258	1.45	0.289	0.922	0.155	1.06	0.172	1.97	0.315	16.3
Chihu deposit	CH-4	porphyritic granodiorite	315	76.03	0.27	12.97	1.76	0.02	0.99	0.64	3.24	1.66	0.08	2.05	99.7	52.7037	5.23	70.6	4	6.65	4.76	511	49.6	9.81		38.9	258	8.16	82.5	3.39	1.19	546	8.9	22.5	2.18	8.77	1.67	0.549	1.54	0.268	1.64	0.327	1.11	0.202	1.36	0.215	2.93	0.373	12.5
Chihu deposit	CH-5	porphyritic granodiorite	315	76.54	0.28	12.76	1.74	0.02	0.88	0.6	3.16	1.7	0.07	1.95	99.69	50.0475	5.03	63.4	3.8	7.77	3.91	433	43.2	8.51		36.3	222	6.87	72.4	2.89	1.24	451	6.37	19.1	1.59	6.71	1.27	0.413	1.17	0.222	1.28	0.274	0.853	0.162	1.13	0.194	2.65	0.329	12.8
Chihu deposit	CHOO 1-7	porphyritic granodiorite	315	78.43	0.24	11.08	1.62	0.02	0.79	1.45	4.26	0.78	0.07	0.98	99.71	49.1369	4.42	31.4	4.56	4.27	3.46	490	35.1	8.66		15.1	269	7.38	47.7	2.75	0.736	238	8.88	16.1	1.87	7.28	1.41	0.452	1.33	0.229	1.37	0.273	0.878	0.151	0.98	0.17	1.74	0.269	14.2
Nanhugebi	KZ03-6	granodiorite	313	57.09	0.75	18.66	6.71	0.14	2.91	5.4	5.01	1.04	0.23	1.89	99.84	46.2116		141.7	5.08	14.8	5.98			20.84		17.69	703.4	14.47	73.06	3.09	0.39	382.5	10.92	22.06	3.22	13.87	3.03	1.15	2.58	0.46	2.57	0.5	1.51	0.22	1.5	0.23	2.12	0.25	3.49
Nanhugebi	KZ03-7	granodiorite	313	57.72	0.47	19.63	5.66	0.08	1.66	6.19	5.44	1.1	0.24	1.6	99.8	36.7493		102.3	4.63	12.18	3.75			19.23		19.34	932.4	7.64	97.64	1.76	1.12	495.1	8.93	18.76	2.19	8.64	1.63	1.05	1.53	0.23	1.28	0.25	0.89	0.13	0.9	0.16	2.44	0.19	6.79
Nanhugebi	12KZ03-9	granodiorite	313	65.83	0.46	16.59	3.81	0.08	1.42	3.81	4.75	2.32	0.12	0.82	100.01	42.4738		87.6	1.66	10	3.22			17.5		39.1	585	12	81.4	3.32	0.8	907	12.2	25.1	3.22	14	2.73	0.94	2.31	0.42	2.17	0.41	1.19	0.2	1.34	0.21	2.71	0.33	5.29
Northeast of Chihu	X3ET-461	K-feldspar granite	311	71.1305	0.363124	14.0701	2.77657	0.0698316	0.776128	2.46506	4.09213	2.79825	0.0818027	1.0379	99.69	35.6398		33.51	15.11	4.219	2.314	3.911	45.48	15.27		62.2	217.9	20.76	25.96	6.005	0.731	737.5	15.85	30.18	3.677	14.55	3.13	0.793	3.192	0.525	3.32	0.703	2.058	0.314	2.109	0.348	1.218	0.468	6.138
Northeast of Chihu	X3ET-462	K-feldspar granite	311	71.4173	0.344119	14.1957	2.71683	0.0655945	0.712458	2.1848	4.42107	2.77515	0.0777043	0.981232	99.92	34.1891		33.87	4.301	4.357	2.23	4.087	42.16	13.97		19.27	85.05	11.54	148.2	5.673	0.602	566.7	5.291	10.92	1.334	5.509	1.363	0.361	1.553	0.29	1.894	0.43	1.268	0.209	1.498	0.249	4.102	0.448	5.588
Northeast of Chihu	X3ET-463	K-feldspar granite	311	71.24	0.364272	14.2823	2.87441	0.077698	0.736617	2.32892	4.38136	2.72044	0.0807252	1.04363	100.16	33.6727		28.07	2.384	3.717	2.321	3.788	36.31	12.18		22.22	68.1	6.128	28.26	3.409	0.575	386	4.099	9.015	1.095	4.196	0.876	0.207	0.918	0.165	1.066	0.235	0.721	0.119	0.861	0.137	1.153	0.15	4.023
Yandong deposit	YD-42	granodiorite porphyry	322	66.8059	0.3211	15.6	3.01	0.0623	1.54	3.26	4.2505	2.1354	0.1165	3.18051	100.282	50.3365	4.55994	48.258	6.94134	11.7886	8.439	22.68	43.39	10.76	0.707	20.0592	318.24	7.5663	80.136	2.3688	1.838	188.118	7.7049	13.986	2.34612	9.93636	1.81314	0.600148	1.64178	0.20538	1.25664	0.25024	0.6732	0.11696	0.76024	0.11968	2.13444	0.266	6.15006
Yandong deposit	YD-46	granodiorite porphyry	322	65.9381	0.2961	15.52	2.79	0.064	1.27	4.56	4.12	2.0854	0.109	3.66015	100.413	47.4172	5.86656	50.0598	11.4584	12.6378	10.75	20.54	45.59	12.64	1.057	20.5254	444.176	8.5995	87.507	2.53386	1.841	212.184	12.2422	24.5448	3.34908	13.9482	2.43684	0.721859	1.98117	0.26586	1.43072	0.28968	0.87176	0.11696	0.86496	0.13872	2.42298	0.3	11.9725
Yandong deposit	YD-55-4-95	granodiorite porphyry	322	67.8552	0.3332	15.87	2.59	0.1487	1.81	2.66	3.786	1.5846	0.1207	2.93176	99.6902	58.0612	6.69438	78.5484	12.0028	12.3052	14.14	37.22	223.5	15.13	1.973	22.9194	504.968	10.3396	101.556	3.02148	2.555	418.824	13.0788	25.2504	3.5406	14.7168	2.74554	0.808597	2.14034	0.29232	1.7272	0.3264	0.98192	0.1496	1.07712	0.1564	2.66364	0.324	6.75234
Northeast of Tuwu	KBDB-5	gabbro	315	52.024	1.1578	16.46	9.74	0.1926	5.62	6.93	4.9872	0.6021	0.1966	1.93962	99.85	53.3378	26.7624	280.728	107.365	43.6338	36.47	27.46	157.4	13.57	1.267	12.0091	390.592	28.224	124.589	3.22812	0.38	264.978	11.8931	31.437	4.25628	20.5632	4.87746	1.72427	4.77364	0.75474	4.94904	1.01456	3.05592	0.43384	2.85328	0.43656	3.2697	0.252	1.70982
Northeast of Tuwu	KBDB-6	gabbro	315	50.3693	0.9138	17.38	9.1	0.1535	6.31	9.22	2.8915	1.1146	0.1603	1.86995	99.4829	57.871	19.152	208.782	114.206	41.2146	72.19	69.61	93.88	12.8	1.229	19.7694	445.4	17.8542	79.6698	2.07522	0.528	294.084	8.46468	21.5838	2.83626	13.293	3.36798	1.17722	3.1977	0.4914	3.1824	0.65144	1.9176	0.2924	1.89448	0.28832	2.21382	0.169	1.4679
Northeast of Tuwu	KBDB-7	gabbro	315	49.0778	0.906	17.4	9.3	0.1502	7	9.04	3.0085	1.2472	0.1632	2.30384	99.5967	59.8571	17.3628	229.068	171.738	49.7196	77.04	69.39	124.7	14.18	1.258	24.381	490.688	18.9756	74.1258	2.10546	0.6	346.752	8.16102	20.7396	2.83878	14.175	3.51414	1.22083	3.59985	0.53676	3.5496	0.72624	2.13112	0.29376	2.0196	0.28696	2.07522	0.181	1.63926
Linglong deposit	LL-5	granite porphyry	310	71.1143	0.3128	14.54	2.58	0.2423	0.87	1.76	5.2471	1.8006	0.0978	1.57414	100.139	40.0488	5.48478	29.1942	11.1964	9.2673	4.391	21.47	1501	13.48	1.295	36.2502	344.352	16.254	127.134	5.17482	0.672	625.716	19.9962	35.8974	4.55868	17.4258	3.1437	0.812065	2.75975	0.3969	2.66832	0.54128	1.7	0.26656	1.91352	0.30736	3.52548	0.521	28.8666
Linglong deposit	LL-6	granite porphyry	310	71.528	0.3093	14.16	2.42	0.0791	0.85	1.58	5.2161	2.4278	0.0936	1.52027	100.184	41.0314	5.20254	27.5058	14.3136	9.26226	4.728	12.27	242.2	13.69	1.323	48.3588	291.72	17.703	116.462	5.62338	0.74	839.538	23.2344	48.447	5.16348	19.7946	3.61368	0.875483	3.06382	0.47124	2.98656	0.5984	1.88632	0.27336	2.0672	0.33728	3.5217	0.631	23.877
Linglong deposit	LL-9	granite porphyry	310	71.9619	0.3033	14.53	2.26	0.0477	0.72	1.04	5.0752	2.8614	0.0901	1.34794	100.238	38.6927	4.68846	23.9526	8.88426	7.30296	1.557	9.924	124.6	13.31	0.95	66.5784	427.584	16.1532	131.292	5.28822	1.303	877.338	18.5598	38.115	4.26888	16.38	2.95596	0.673631	2.65003	0.40572	2.53504	0.54264	1.76528	0.27064	1.97064	0.31824	3.81024	0.573	10.0409
Linglong deposit	LL-10	granite porphyry	310	71.3868	0.3131	14.56	2.34	0.0555	0.82	1.25	5.0772	2.8437	0.0949	1.46691	100.208	40.9754	5.5881	33.5412	5.60448	8.2593	3.06	12.33	132.2	14.58	1.255	65.7972	434.52	17.8542	170.73	6.0732	1.379	962.01	21.4578	38.1654	4.9014	18.5472	3.61116	0.738436	2.97446	0.4536	2.96888	0.61608	1.89992	0.30872	2.18008	0.35768	4.78926	0.652	10.3522
Carboniferous volcanic rocks
Tuwu deposit	Bb-165	basalt		48.26	1.27	17.96	11.065	0.22	6.68	8.02	2.54	0.001	0.33	3.83	99.45	54.7	18.7	212	198	28.4			10.3			44.3	304	22	62.2	7.5	0.358	186	6.87	17.8		15.4	4.65	0.738		0.76					2.87	0.393	2.59	0.494
Tuwu deposit	Bb-152	dacite		65.81	0.57	17.22	3.15	0.11	1.27	3.1	4.3	1.5	0.08	2.36	99.32	45	8.94	56	23.7	8.11			61.7			46.1	316	10	82.1	4.5	0.85	321	15.8	32.2		17.1	3.54	0.948		0.565					1.31	0.195	3.91	0.499
Tuwu deposit	Bb-158	basalt		50.52	1.02	18.63	10.3	0.24	4.46	7.48	2.79	0.75	0.57	3.39	99.59	46.5	27.5	221	119	42.6			83.4			21.2	435	23	95.5	8.8	1.3	679	18	39.2		2.61	6.17	2.01		0.933					2.66	0.412	3.93	0.482
Tuwu deposit	Bb-162	basalt		50.19	1.25	19.19	9.705	0.22	5.17	8.68	1.58	0.001	0.63	3.63	99.59	51.5	28.9	216	264	39.7			80.5			52	441	21	140	5.9	0.327	142	22	50.8		32.7	7.83	2.22		1.1					2.4	0.342	3.66	0.357
Tuwu deposit	Bb-180	rhyolite		73.28	0.17	12.55	1.957	0.12	0.31	2.54	1.35	5.6	0.03	1.9	99.72	24.3	3.24	3.4	6.18	1.19			21.9			38.1	80.7	14	44.4	4.8	1.79	177	14	23.2		10.3	2.57	0.25		0.481					2.19	0.355	2.19	0.459
Tuwu deposit	Bb-185	basaltic andesite		53.65	1.12	22.14	8.09	0.23	4.09	5.06	2.36	0.08	0.43	2.87	99.7	50.5	23.3	177	127	37.4			92.8			47.5	350	15	47.6	5.9	0.805	102	11.3	25.9		16.8	4.19	1.35		0.716					1.74	0.253	2.11	0.149
Tuwu deposit	Bb-270	basalt		42.89	1.12	20.42	11.61	0.18	7.87	8.44	2.15	0.06	0.3	5.05	99.42	57.7	31	198	253	49.3			23.5			64.4	41.6	20	66.8	7.1	0.452	92.3	7.88	17.2		15.8	5.05	1.47		0.683					2.29	0.383	2.58	0.244
Tuwu deposit	Bb-172	basalt		48.06	1.78	18.7	10.47	0.24	7.53	7.02	1.96	0.001	0.27	5.1	99.8	59	31.2	205	306	50.2			78.6			54.5	244	20	54.2	6.9	0.549	151	10.3	23.8		16.3	4.65	1.49		0.971					2.6	0.366	2.77	0.238
Fuxing deposit	FX-4201-2	basalt		47.47	1.1	18.01	9.35	0.28	6.9	7.56	2.71	0.34	0.17	5.7	99.59	59.3816	26.4	206	209	38.4	117	74.9	86.2	16.5		7.76	753	20.8	33.8	2.51	0.828	71.7	6.83	15.5	2.38	12.1	3.22	1.12	3.57	0.68	4.19	0.802	2.45	0.363	2.23	0.335	1.2	0.178	8.85
Fuxing deposit	FX-4201-1	basalt		49.58	1.13	17.08	9.55	0.26	7.45	7.92	2.44	0.42	0.37	3.4	99.6	60.7137	27.8	228	345	39.1	149	381	79	18.2		9.64	674	27.6	60.1	4.94	0.869	132	14.8	33.1	4.71	22.4	5.28	1.59	5.32	0.961	5.62	1.08	3.23	0.48	2.88	0.424	2.04	0.328	1.84
Fuxing deposit	FX-4201-3	basalt		51.22	1.17	16.51	8.95	0.22	7.11	8.17	2.29	0.55	0.37	3.07	99.63	61.1463	27.6	215	270	37.2	137	997	108	17.8		15	614	27.1	68.4	4.92	1.33	147	13.9	31.5	4.5	21.6	4.96	1.5	5.11	0.935	5.54	1.04	3.16	0.461	2.86	0.417	2.02	0.325	2.41
Fuxing deposit	FX-4201-4	basalt		51.61	1.2	16.83	9.24	0.2	6.7	7.8	2.27	0.58	0.39	2.88	99.7	58.9569	28.3	227	293	38.5	143	871	86.2	18.1		15.4	593	28.2	102	5.19	1.26	157	15.1	33.5	4.83	22.7	5.36	1.6	5.32	0.963	5.58	1.11	3.33	0.508	3.06	0.444	2.89	0.328	2.23
Fuxing deposit	FX-4201-5	basalt		54.9	1.06	15.7	8.41	0.22	6.83	5.85	2.64	0.51	0.35	3.28	99.74	61.669	27.4	204	253	34.6	125	699	119	17		13.4	574	25.9	55.2	4.55	1.17	148	14	31.4	4.45	21.5	4.94	1.49	4.96	0.881	5.38	1.01	3.08	0.433	2.6	0.385	1.79	0.311	1.79
Fuxing deposit	15FX-87	basalt		52.53	1.13	16.8	8.94	0.2	5.66	7.44	2.62	0.41	0.32	3.36	99.41	55.6386	21.5	195	108	30.7	82.6	399	81.3	16.6		8.85	585	26.3	182	6.3	0.961	123	16.4	37.5	4.99	23.1	5.64	1.34	4.36	0.944	4.75	0.899	3.03	0.348	3	0.486	4.56	0.298	2.32
Fuxing deposit	FX-2804-11	dacite		66.13	0.51	16.89	1.44	0.12	0.76	3.36	1.23	4.01	0.06	5.08	99.59	51.1133	14.9	15.2	1.73	0.838	2.87	50	82.7	25.8		89.3	158	54.9	668	15.5	4.04	716	40.9	91.7	12.6	54.8	12.1	2.15	10.1	1.77	10.3	2.12	7.42	1.32	8.98	1.48	18.7	1.25	7.6
Fuxing deposit	FX-2804-10	dacite		67.91	0.37	13.16	2.23	0.18	1.02	4.77	2.13	2.48	0.05	5.48	99.78	47.5375	10.4	10.5	2.4	2.05	3.53	63.2	106	18.9		55.1	176	43.7	440	11.7	3.7	382	31.6	69.5	9.62	41.7	9.05	1.41	7.65	1.38	8.09	1.69	5.78	0.966	6.55	1.06	12.1	0.933	13
Fuxing deposit	15FX-93	dacite		76.93	0.4	13.89	0.75	0	0.21	0.59	0.95	3.35	0.02	2.32	99.42	35.6785	11.4	15.8	0.183	0.381	0.686	24.7	9.27	16.1		60.1	211	41.8	435	13.9	1.77	790	12.7	26.7	3.86	17.6	4.09	0.7	4.67	1.15	6.05	1.28	4.75	0.833	5.76	0.91	13.7	0.679	3.85
Yandong deposit	ZK198-391	basalt		49.9	1.35	17.83	13.165	6.81	3.26	2.5	1.01	0.24	0.38	4.17	99.87	32.911			115	47.1	75.8					20.6	292	22.4	176	5.59	4.24	226	13.6	33	4.8	21.7	4.79	1.39	4.79	0.82	5.21	0.97	2.77	0.46	2.79	0.47	4.22	0.29	4.07
Yandong deposit	ZK198-165	andesite		52.75	1.36	13.65	12.22	5.23	5.45	4.31	0.24	0.19	0.28	4.46	99.55	46.908			69.4	24.5	42.9					3.17	359	23.6	150	2.93	1.14	132	10.6	25.8	3.87	17.4	4.43	1.36	4.29	0.77	4.94	0.98	2.82	0.49	3.04	0.5	4.11	0.15	3.44
Yandong deposit	ZK198-203	andesite		53.86	1.13	15.73	7.725	5.5	7.77	5.05	0.04	0.13	0.21	2.9	99.76	66.584			14.8	26.6	37					0.204	1095	13.3	128	2.38	0.278	49	8.78	21	3.02	13.7	3.22	1.14	2.87	0.48	2.81	0.56	1.5	0.25	1.5	0.25	3.29	0.14	10.6
Yandong deposit	ZK198-272	andesite		55.81	1.19	16.67	9.63	5.77	1.95	4.92	0.47	0.17	0.23	3.45	99.72	28.6298			12.5	29.5	28.6					6.8	209	13.1	134	2.38	2.12	138	7.98	20.5	2.77	12.3	2.99	1.04	2.87	0.48	2.81	0.55	1.51	0.25	1.5	0.23	3.36	0.13	1.63
Yandong deposit	ZK198-396	andesite		61.42	1.16	13.53	8.115	2.22	4.31	5.61	0.08	0.15	0.41	3.18	99.71	51.2708			3.48	8.22	1.91					1.19	347	28.7	190	3.9	0.467	45.6	12.8	31.8	4.85	22.3	5.38	1.51	5.36	0.94	5.86	1.19	3.5	0.6	3.57	0.63	5.23	0.22	3.1
Yandong deposit	YZK1502-685	andesite		51.24	0.98	18.87	8.555	4.46	7.18	1.99	0.98	0.23	0.16	5.7	99.82	62.4432			53.2	27.1	49.5					20.9	492	13.8	66	1.73	2.71	103	7.43	15.7	2.17	10.5	2.71	0.78	2.67	0.49	2.18	0.48	1.43	0.22	1.3	0.19	2.07	0.16	4.29
Yandong deposit	YZK1502-819	andesite		53.06	0.89	17.63	9.565	5.04	6.61	2.27	0.53	0.26	0.16	4.34	99.83	57.7884			57	39	50.9					12.4	893	13.1	79.9	1.47	1.5	117	6.41	14.6	2	9.7	2.51	0.83	2.42	0.45	2.48	0.42	1.33	0.17	1.39	0.17	2.16	0.13	8.74
Tuwu deposit	TW13-4b	andesite		51.6	1	17.1	9.26	0.45	6.75	7.35	2.13	0.11	0.2	4.3	100.3	59.0845										0.4	546	15.9	115	3.2	0.89	71.9	8.63	19.4	2.91	13.5	3.21	1.13	3.06	0.54	3.17	0.65	1.82	0.31	1.87	0.31	3	0.19
Tuwu deposit	TW16-1b	andesite		52.8	0.98	16	8.94	0.14	6.23	8.33	3.37	0.13	0.25	3.1	100.3	57.9924										0.4	661	14.6	117	3.69	0.39	127	7.9	18.6	2.71	12.4	3.11	1.16	2.84	0.49	3.14	0.63	1.78	0.3	1.78	0.3	3.1	0.22
Tuwu deposit	TZK002-48b	andesite		55.2	1.04	17.8	8	0.06	5.54	5.27	3.02	0.12	0.24	4.2	100.5	57.8391										2.6	540	18.7	104	2.29	0.97	72.4	8.34	19.2	2.8	14	3.39	1.3	3.28	0.63	3.37	0.67	1.92	0.28	1.66	0.27	2.96	0.18
Tuwu deposit	TW18-5b	andesite		52.5	1.22	14.3	13.41	0.21	6.62	3.18	3.72	0.22	0.27	4.71	100.4	49.4429										3.9	559	22.5	126	2.58	0.73	187	9.4	22.9	3.4	15.9	4.09	1.38	3.94	0.73	4.55	0.95	2.74	0.47	2.94	0.48	3.66	0.14
Tuwu deposit	TW13-3b	andesite		53.2	0.99	16.3	9.49	0.13	5.38	7.87	3.39	0.12	0.22	3.2	100.3	52.8985										0.6	655	15.8	125	4.11	0.34	127	8.43	19.8	2.91	13.6	3.25	1.25	3.16	0.56	3.46	0.67	1.92	0.32	1.92	0.33	3.09	0.23
Tuwu deposit	TW11-9b	andesite		54.9	1.03	15.3	9.36	0.13	5.6	4.78	5.2	0.81	0.17	2.63	100	54.2383										15.5	847	15.4	133	2.69	1.45	367	9.05	21.8	3.12	14	3.21	1.23	3.2	0.54	3.29	0.64	1.8	0.3	1.94	0.31	3.33	0.15
Tuwu deposit	TW13-11-1	andesite		52.7	1.03	16.3	8.01	0.16	5.46	7.9	4.86	0.24	0.29	2.82	99.8	57.4535			211	34.1	157					1	918	15.8	77.1	3.5	0.37	110	8.2	20.6	2.93	12.7	3.15	1.11	3.53	0.52	3.13	0.62	1.67	0.22	1.4	0.19	2.1	0.21
Tuwu deposit	TW13-11-2	andesite		52.2	1.08	16.1	8.38	0.15	5.43	7.06	5.22	0.24	0.33	2.77	98.9	56.2105			235	35.2	172					1.1	854	17	81.2	3.7	0.39	130	9.4	23.1	3.38	14.5	3.62	1.22	3.89	0.59	3.4	0.69	1.81	0.24	1.51	0.21	2.3	0.23
Tuwu deposit	TW4803-5	andesite		53.9	0.89	17.42	7.7	0.09	5.57	5.32	3.9	0.71	0.24	3.92	99.65	58.8991	19.9	183	114	32.7	1220	1240	61.5	16.3		17.6	562	15.9	81.7	2.91	2.84	108	8.66	19.6	2.75	12.5	2.97	0.95	2.86	0.51	3.11	0.6	1.75	0.26	1.63	0.24	2.23	0.2	8.95
Tuwu deposit	TW4803-6	andesite		54.04	0.95	17.72	7.8	0.09	4.52	7.53	2.92	1.14	0.3	2.74	99.74	53.4447	24.6	200	80.6	25.8	80.1	540	41.1	18.9		33	898	24.4	156	4.67	3.88	180	19.4	44	5.97	26.1	5.27	1.55	4.91	0.82	4.74	0.91	2.66	0.38	2.49	0.36	4.01	0.32	1.88
Qi’eshan Group	X3ET283	high-alumina basalt	337	52.6	1.01	18.8	8.64	0.12	4.83	7.53	3.45	0.15	0.22	2.58	99.9	52.5494	21.2	186	94.7	30.7	76	42.9	81.4	19.8	1.96	0.71	756	14	81.7	3.33	0.43	106	7.48	18.3	2.59	12	2.96	1.08	3.05	0.47	2.72	0.55	1.52	0.22	1.39	0.21	2.16	0.23	2.17
Qi’eshan Group	X3ET285	high-alumina basalt	337	50.9	0.99	18.4	8.51	0.15	5.7	8.09	3.26	0.12	0.22	3.12	99.4	57.0243	21.4	197	85.7	29.6	78	39.4	83.7	19.7	2.08	0.51	748	14.4	81	3.25	0.26	84.1	7.34	18	2.62	12.1	2.98	1.11	3.14	0.48	2.81	0.57	1.59	0.23	1.46	0.22	2.18	0.23	2.66
Qi’eshan Group	X3ET286	high-alumina basalt	337	52.3	1	18.4	8.51	0.14	5.15	8.35	2.97	0.14	0.22	2.79	99.9	54.522	21.6	197	92.1	30.7	79.5	24.4	80.4	20.2	2.04	0.51	780	14.6	82.5	3.35	0.26	95	7.66	18.3	2.68	12.5	3.12	1.11	3.2	0.48	2.88	0.58	1.59	0.24	1.49	0.23	2.23	0.23	2.72
Qi’eshan Group	X3ET287	high-alumina basalt	337	51.9	1	18.4	8.89	0.12	5.23	7.31	3.57	0.18	0.21	2.64	99.5	53.8201	21.8	194	92.8	31.6	81.9	33.9	89	20.5	1.94	0.8	721	14.6	82.3	3.32	0.45	145	7.51	18.5	2.62	12.1	3.04	1.08	3.09	0.48	2.86	0.59	1.6	0.24	1.46	0.23	2.2	0.22	3.05
Qi’eshan Group	X3ET288	high-alumina basalt	337	52.5	0.97	18.4	8.42	0.15	5.07	8	2.95	0.12	0.21	2.96	99.7	54.3974	20.7	181	97.9	30.2	76.6	30.1	86.9	19.3	2.16	0.38	772	14	78.2	3.18	0.37	81.2	7.29	18	2.54	11.8	2.9	1.05	3.04	0.46	2.75	0.57	1.55	0.23	1.39	0.22	2.11	0.22	2.67
Qi’eshan Group	X3ET289	high-alumina basalt	337	51.9	0.98	18.1	8.74	0.11	4.86	6.43	3.94	0.9	0.21	3.92	100	52.4168	20.9	87.2	73.3	28.8	82.2	12.2	80.3	18.7	1.84	8.61	735	13.8	72.5	3.03	1.2	362	7.3	17.9	2.53	11.9	2.92	1.06	3	0.46	2.71	0.55	1.51	0.22	1.35	0.21	1.96	0.21	2.27
Qi’eshan Group	X3ET290	high-alumina basalt	337	50.2	1.05	19.1	9.17	0.11	5.99	5.77	3.69	1.12	0.23	3.35	99.8	56.4089	22.3	155	99.4	32.2	80.2	10.4	86.1	20.4	2.02	11.3	804	15.5	84.2	3.36	1.43	430	7.99	19.6	2.79	12.9	3.23	1.14	3.34	0.51	2.99	0.62	1.66	0.24	1.52	0.24	2.25	0.23	2.49
Qi’eshan Group	X3ET292	high-alumina basalt	337	53.2	1	18	8.84	0.1	5.27	4.1	3.95	1.58	0.21	3.22	99.5	54.1495	21	128	93.8	29.6	76.7	11.3	79.8	17.6	1.92	16.2	660	14.4	78.3	3.1	1.75	586	7.47	18.2	2.59	11.9	3.05	1.06	3.1	0.47	2.79	0.56	1.55	0.23	1.42	0.22	2.13	0.22	2.22
Qi’eshan Group	X3ET293	high-alumina basalt	337	50.7	1	18.8	8.89	0.11	5.36	6.04	3.65	1.15	0.21	3.62	99.5	54.4298	21.7	110	98.7	30.5	79.1	13.5	83.8	20.3	2.05	12	736	14.8	80.4	3.2	1.51	456	7.53	18.6	2.64	12.2	3.07	1.11	3.15	0.48	2.87	0.59	1.62	0.23	1.48	0.23	2.18	0.22	2.59
Qi’eshan Group	X3ET294	high-alumina basalt	337	50	1.14	20.2	9.62	0.19	5.97	5.57	3.33	0.22	0.22	3.52	100	55.1448	22.5	194	117	34.8	93.6	78	96	22.9	2.24	1.76	625	16.9	88.3	3.62	1.11	106	7.21	18	2.75	13.1	3.33	1.11	3.54	0.54	3.23	0.66	1.86	0.27	1.65	0.26	2.41	0.25	2.44
Qi’eshan Group	X3ET295	high-alumina basalt	337	51.5	1	18.1	8.91	0.11	4.98	6.3	3.91	0.88	0.21	3.53	99.4	52.5447	21.5	100	96.6	30.3	74.7	12.5	85.3	19.3	2.02	8.53	766	14.5	79.7	3.18	1.21	361	7.55	18.5	2.63	12.2	3.02	1.11	3.11	0.47	2.87	0.58	1.59	0.23	1.45	0.23	2.18	0.22	2.43
Qi’eshan Group	TWlh	basalt	314	49.62	1.57	17.09	10.112	0.17	6.41	7.61	3.05	0.14	0.51	4.39	103.52	55.6694	9.03	232						18.8		1.46	805	20.7	167	4.97	0.49	116	18.5	50.6	7.6	33.7	6.85	1.88	5.92	0.88	4.74	0.91	2.55	0.38	2.54	0.41	4.23	0.27
Qi’eshan Group	TW2h	basalt	314	49.31	1.46	17.7	10.108	0.19	6.15	7.5	3.22	0.61	0.44	3.89	103.17	54.6551	12	224						19		6.96	730	20.9	158	6.55	0.95	397	15.2	38.7	5.48	23.5	5.49	1.52	5.07	0.77	4.51	0.89	2.52	0.4	2.68	0.41	3.66	0.38
Qi’eshan Group	TW-3h	basalt	314	51.48	1.4	17.6	9.838	0.16	4.81	7	3.7	0.61	0.48	3.53	102.82	49.2017	12.6	217						17.5		7.44	824	23.5	160	6.85	1.13	354	15.6	41.7	5.86	24.2	5.51	1.62	5.21	0.8	4.54	0.87	2.49	0.38	2.67	0.42	3.68	0.37
Qi’eshan Group	TW-4h	basalt	314	48.56	1.47	17.57	10.88	0.17	6.46	6.54	3.18	1.1	0.41	4.27	103.65	54.0492	7.26	222						17.8		14.2	642	20.9	152	6.16	1	456	13.3	36.1	5.06	21.2	5.14	1.5	4.88	0.76	4.42	0.88	2.49	0.38	2.6	0.42	3.5	0.32
Qi’eshan Group	SL-1h	basalt	314	48.05	1.45	18.24	10.758	0.21	6.01	6.55	3.87	0.71	0.47	4.27	103.69	52.5327	4.52	224						17.6		8.28	799	19.3	164	6.68	1.15	300	13.5	36.6	5.24	22.4	5.24	1.49	4.82	0.76	4.43	0.87	2.43	0.37	2.46	0.4	3.79	0.34
Qi’eshan Group	SL-2h	basalt	314	46.54	1.86	17.61	11.463	0.16	7.31	7.68	3.15	0.16	0.42	4.29	103.48	55.817	4.67	252						17.8		1.24	325	11.2	174	4.82	0.095	106	7.28	22	3.53	16.2	4.16	1.26	4.24	0.67	3.85	0.76	2.02	0.3	1.99	0.3	4.02	0.26
Qi’eshan Group	SL-3h	basalt	314	47.55	1.64	16.89	11.016	0.18	7.94	7.75	2.83	0.14	0.3	4.27	103.36	58.8116	11.2	227						17.4		2.15	523	21.9	128	3.56	0.4	119	7.09	20.2	3.31	15.7	4.39	1.35	4.69	0.76	4.73	0.95	2.72	0.42	2.72	0.42	2.98	0.23
Qi’eshan Group	SL-4h	basalt	314	52.59	0.97	17.81	8.532	0.15	5.56	7.52	3.36	0.34	0.25	3.38	102.76	56.3504	12.9	198						17		4.11	674	15	83.8	2.84	0.46	201	6.41	18.1	2.72	12.6	3.17	1.07	3.14	0.5	2.96	0.58	1.61	0.24	1.63	0.26	2.1	0.18
Qi’eshan Group	SL-5h	basalt	314	52.64	0.88	18.46	8.346	0.15	5.21	3.78	6.05	0.2	0.28	4.41	103.04	55.2905	7.43	155						17		1.28	788	18.7	108	3.57	1.56	130	8.93	23.3	3.44	15.1	3.66	1.15	3.69	0.58	3.5	0.71	2.02	0.32	2.11	0.33	2.71	0.2
Qi’eshan Group	SL-6h	basalt	314	48.72	1.1	20.55	9.887	0.2	5.62	6.16	3.66	0.14	0.26	4.19	103.54	52.9648	5.99	214						17.6		1.09	833	16.5	98.8	4.76	0.66	86.2	7.39	19.6	2.81	12.5	3.2	1.16	3.44	0.55	3.24	0.66	1.89	0.28	1.93	0.31	2.44	0.26
Qi’eshan Group	NH-1h	basalt	316	52.4	1.02	19.11	8.766	0.14	5.06	6.76	3.5	0.17	0.24	3.18	102.39	53.3476	14.2	188						18.4		1.48	812	16.8	84.3	3.85	0.38	135	7.46	19.4	2.85	12.6	3.22	1.1	3.3	0.52	3.14	0.64	1.8	0.27	1.81	0.28	2.16	0.26
Qi’eshan Group	NH-2h	basalt	316	48.16	1.58	18.21	10.779	0.19	6.39	6.71	3.47	0.34	0.31	4.53	103.84	54.0102	9.04	249						18.2		4.36	778	17.6	117	4.82	1.11	195	9.72	26.5	3.98	16.8	4.25	1.24	4.18	0.64	3.76	0.75	2.15	0.32	2.11	0.32	2.85	0.3
Qi’eshan Group	NH-3h	basalt	316	48.29	1.57	17.82	11.089	0.18	6.11	6.87	3.6	0.34	0.31	4.57	103.89	52.1884	7.15	248						17.1		4.63	849	17.3	119	4.96	1.21	220	9.28	26.2	3.83	16.5	4.23	1.18	4.15	0.65	3.75	0.75	2.06	0.31	2.06	0.32	2.93	0.28
Note: Mg#=100×Mg2+/(Mg2+ + Fe2+)
References:
[1]. Du, L., et al., Petrogenesis and Geodynamic Implications of the Carboniferous Granitoids in the Dananhu Belt, Eastern Tianshan Orogenic Belt. Journal of Earth Science, 2019. 30(6): p. 1243-1252.
[2]. Xiao, B., et al., Magmatic evolution of the Tuwu–Yandong porphyry Cu belt, NW China: Constraints from geochronology, geochemistry and Sr–Nd–Hf isotopes. Gondwana Research, 2017. 43: p. 74-91.
[3]. Shen, P., H. Pan and L. Dong, Yandong porphyry Cu deposit, Xinjiang, China—Geology, geochemistry and SIMS U–Pb zircon geochronology of host porphyries and associated alteration and mineralization. Journal of Asian Earth Sciences, 2014. 80: p. 197-217.
[4]. Wang, Y., et al., Origin of the subduction-related Carboniferous intrusions associated with the Yandong porphyry Cu deposit in eastern Tianshan, NW China: constraints from geology, geochronology, geochemistry, and Sr–Nd–Pb–Hf–O isotopes. Mineralium Deposita, 2018. 53(5): p. 629-647.
[5]. Wang, Y., et al., Geochemistry, geochronology, Hf isotope, and geological significance of the Tuwu porphyry copper deposit in eastern Tianshan, Xinjiang. Acta Petrologica Sinica, 2014. 30(11): p. 3383-3399.
[6]. Sun, M., et al., Petrogenesis of Late Carboniferous intrusions in the Linglong area of Eastern Tianshan, NW China, and tectonic implications: Geochronological, geochemical, and zircon Hf–O isotopic constraints. Ore Geology Reviews, 2020. 120: p. 103462.
[7]. Mao, Q., et al., Silurian to early Permian slab melting and crustal growth in the southern Altaids: insights from adakites and associated mineral deposits in the Dananhu arc, Eastern Tianshan, NW China. International Journal of Earth Sciences, 2021. 110(6): p. 2115-2131.
[8]. Wang, Y., et al., Carboniferous magmatism and mineralization in the area of the Fuxing Cu deposit, Eastern Tianshan, China: Evidence from zircon U–Pb ages, petrogeochemistry, and Sr–Nd–Hf–O isotopic compositions. Gondwana Research, 2016. 34: p. 109-128.
[9]. Wang, Y., et al., Petrogenesis of magmatism in the Yandong region of Eastern Tianshan, Xinjiang: geochemical, geochronological, and Hf isotope constraints. International Geology Review, 2015. 57(9-10): p. 1130-1151.
[10]. Han, C., et al., Geological characteristics and genesis of the Tuwu porphyry copper deposit, Hami, Xinjiang, Central Asia. Ore Geology Reviews, 2006. 29(1): p. 77-94.
[11]. Shen, P., et al., Petrography, geochemistry and geochronology of the host porphyries and associated alteration at the Tuwu Cu deposit, NW China: a case for increased depositional efficiency by reaction with mafic hostrock? Mineralium Deposita, 2014. 49(6): p. 709-731.
[12]. Lianchang, Z., W. Bo and L. Wenqian, Geochemistry and tectonic setting of copper-bearing porphyries on the southern margin of Tuha basin, Xinjiang. Acta Petrologica Sinica, 2006. 22(1): p. 935.
[13]. Wang, Y., et al., Early Carboniferous adakitic rocks in the area of the Tuwu deposit, eastern Tianshan, NW China: Slab melting and implications for porphyry copper mineralization. Journal of Asian Earth Sciences, 2015. 103: p. 332-349.
[14]. Zhang, L.C., et al., The relationship between ore-forming processes and adakitic rock in Tuwu-Yandong porphyry copper metallogenic belt, eastern Tianshan mountains. Acta Petrologica Sinica, 2004. 20(2): p. 259-268.
[15]. Zhang, F., Y. Wang and J. Liu, Petrogenesis of Late Carboniferous granitoids in the Chihu area of Eastern Tianshan, Northwest China, and tectonic implications: geochronological, geochemical, and zircon Hf–O isotopic constraints. International Geology Review, 2016. 58(8): p. 949-966.
[16]. Xia, L., et al., Petrogenesis of Carboniferous rift-related volcanic rocks in the Tianshan, northwestern China. Geological Society of America Bulletin, 2004. 116(3-4): p. 419-433.
[17]. Zhang, Y., et al., Alternating Trench Advance and Retreat: Insights From Paleozoic Magmatism in the Eastern Tianshan, Central Asian Orogenic Belt. Tectonics, 2018. 37(7): p. 2142-2164.
[18]. Jianke, B., et al., Zircon U-Pb geochronology and geochemistry of basalts from the Qi'eshan Group in the southern Turpan-Hami Basin, East Tianshan: Constraints on closure time of the North Tianshan Ocean. Acta Petrologica Sinica, 2018. 34(10): p. 2995-3010.
[truncated: 3 more columns]
