# Supplementary material
Source: MDPI journal article supplement (https://www.mdpi.com/2075-163X/12/12/1573)
Supplement: s1 [file Supplementary Table S2.xlsx]

## Sheet: Sheet1
Supplementary Table S2
Published in-situ zircon Lu-Hf isotope compositions for Carboniferous magmatic rocks in the Tuwu-Yandong belt (and adjacent areas in the middle section of the Dananhu island arc)
Location	Rock type	Rock age(Ma)	No.	Age-corrected (Ma)	176Yb/177Hf	2σ	176Lu/177Hf	2σ	176Hf/177Hf	2σ	εHf(0)	εHf(t)	TDM1	TDM2（Ma）	fLu/Hf	TDM2-Age	Age-TDM1	Reference
Heicaotan	porphyritic granite	357	X3ET372-01	361.8	0.046808	0.000478	0.001616	9e-06	0.282919	9e-06	5.19	12.8	480	547	-0.95	185.2	-118.2	[1]
Heicaotan	porphyritic granite	357	X3ET372-02	354.2	0.045053	0.000253	0.001505	1.2e-05	0.282902	9e-06	4.59	12	503	588	-0.95	233.8	-148.8	[1]
Heicaotan	porphyritic granite	357	X3ET372-03	359.6	0.049723	0.000452	0.001702	2.4e-05	0.282874	1e-05	3.62	11.1	545	650	-0.95	290.4	-185.4	[1]
Heicaotan	porphyritic granite	357	X3ET372-04	351.5	0.074748	0.001156	0.00244	2.2e-05	0.282934	1e-05	5.73	12.9	469	531	-0.93	179.5	-117.5	[1]
Heicaotan	porphyritic granite	357	X3ET372-05	361.4	0.055485	0.000457	0.001815	1.9e-05	0.282923	1e-05	5.33	12.9	477	542	-0.95	180.6	-115.6	[1]
Heicaotan	porphyritic granite	357	X3ET372-06	350.6	0.043047	0.000666	0.001378	1.8e-05	0.282922	9e-06	5.3	12.7	472	543	-0.96	192.4	-121.4	[1]
Heicaotan	porphyritic granite	357	X3ET372-07	360.4	0.034376	0.000327	0.001108	1e-05	0.282923	9e-06	5.32	13	468	532	-0.97	171.6	-107.6	[1]
Heicaotan	porphyritic granite	357	X3ET372-08	354.8	0.045081	0.00029	0.001488	1.8e-05	0.282852	1.2e-05	2.82	10.3	575	700	-0.96	345.2	-220.2	[1]
Heicaotan	porphyritic granite	357	X3ET372-09	357.7	0.044227	0.000272	0.001503	1.6e-05	0.282884	8e-06	3.97	11.5	528	625	-0.95	267.3	-170.3	[1]
Heicaotan	porphyritic granite	357	X3ET372-10	355.6	0.076706	0.001303	0.002337	3.4e-05	0.282949	1e-05	6.27	13.5	445	493	-0.93	137.4	-89.4	[1]
Heicaotan	porphyritic granite	357	X3ET372-11	353.5	0.052439	0.000438	0.001668	1.4e-05	0.282921	9e-06	5.25	12.6	478	548	-0.95	194.5	-124.5	[1]
Heicaotan	porphyritic granite	357	X3ET372-12	356.8	0.05646	0.000877	0.002075	3.6e-05	0.282888	1e-05	4.11	11.5	531	626	-0.94	269.2	-174.2	[1]
Heicaotan	porphyritic granite	357	X3ET372-13	354.8	0.063488	6.6e-05	0.002126	4e-06	0.282907	1e-05	4.76	12.1	505	586	-0.94	231.2	-150.2	[1]
Heicaotan	porphyritic granite	357	X3ET372-14	351.3	0.059294	0.000441	0.001793	1.7e-05	0.282914	9e-06	5.02	12.3	490	567	-0.95	215.7	-138.7	[1]
Heicaotan	porphyritic granite	357	X3ET372-15	361.4	0.082727	0.000474	0.002457	1.2e-05	0.282919	9e-06	5.21	12.6	490	559	-0.93	197.6	-128.6	[1]
Heicaotan	porphyritic granite	357	X3ET372-16	355.3	0.060024	0.000389	0.002305	1.5e-05	0.282854	1.6e-05	2.89	10.2	585	708	-0.93	352.7	-229.7	[1]
Heicaotan	porphyritic granite	357	X3ET372-17	361.5	0.055953	0.000294	0.00175	1.2e-05	0.282941	8e-06	5.96	13.5	450	500	-0.95	138.5	-88.5	[1]
Heicaotan	porphyritic granite	357	X3ET372-18	354.9	0.035503	0.000318	0.00111	1.5e-05	0.28293	9e-06	5.59	13.1	458	518	-0.97	163.1	-103.1	[1]
Heicaotan	porphyritic granite	357	X3ET372-19	362.1	0.055099	0.000266	0.001803	1.2e-05	0.282959	9e-06	6.6	14.1	425	460	-0.95	97.9	-62.9	[1]
Heicaotan	porphyritic granite	357	X3ET372-20	357.3	0.063984	0.000589	0.002379	1.5e-05	0.282865	1.2e-05	3.29	10.6	569	682	-0.93	324.7	-211.7	[1]
Yandong deposit	diorite porphyry	339	YD-5501-99-2@01	346.754	0.0582672		0.00202555		0.282903	3.50466e-05	4.63659	11.806	508.38	597.997	-0.938989	251.242	-161.626	[2]
Yandong deposit	diorite porphyry	339	YD-5501-99-2@03	333.383	0.0630911		0.00208873		0.282868	3.19761e-05	3.39664	10.2736	560.466	685.764	-0.937086	352.381	-227.084	[2]
Yandong deposit	diorite porphyry	339	YD-5501-99-2@08	350.921	0.0413333		0.00141459		0.282818	3.65718e-05	1.625	9.02068	622.063	779.482	-0.957392	428.561	-271.142	[2]
Yandong deposit	diorite porphyry	339	YD-5501-99-2@11	336.577	0.0662026		0.00220608		0.28282	2.69959e-05	1.70435	8.62002	632.305	793.995	-0.933552	457.418	-295.728	[2]
Yandong deposit	diorite porphyry	339	YD-5501-99-2@12	345.937	0.0437647		0.00156695		0.282913	2.17372e-05	4.98821	12.246	487.754	569.167	-0.952803	223.23	-141.817	[2]
Yandong deposit	diorite porphyry	339	YD-5501-99-2@13	336.511	0.0519616		0.0018638		0.282919	1.97218e-05	5.20552	12.1988	482.772	564.881	-0.943862	228.37	-146.261	[2]
Yandong deposit	diorite porphyry	339	YD-5501-99-2@15	337.976	0.0945871		0.00370597		0.282943	3.3167e-05	6.04496	12.6567	471.973	536.647	-0.888375	198.671	-133.997	[2]
Yandong deposit	diorite porphyry	339	YD-5501-99-2@16	342.562	0.0687191		0.00242006		0.282913	2.06095e-05	5.00245	11.9955	498.672	582.598	-0.927107	240.036	-156.11	[2]
Yandong deposit	diorite porphyry	339	YD-5501-99-2@18	332.413	0.0382899		0.00135291		0.282931	2.03867e-05	5.63701	12.6576	458.657	532.285	-0.95925	199.872	-126.244	[2]
Yandong deposit	diorite porphyry	339	YD-5501-99-2@19	336.075	0.0495948		0.00172867		0.282889	2.46941e-05	4.12762	11.1411	525.104	632.313	-0.947932	296.237	-189.029	[2]
Yandong deposit	diorite porphyry	339	YD-5501-99-2@20	333.968	0.0364337		0.00127614		0.282914	2.10506e-05	5.03115	12.1013	482.215	569.161	-0.961562	235.193	-148.247	[2]
Yandong deposit	diorite porphyry	339	YD-5501-99-2@21	335.507	0.0440248		0.00154766		0.282928	2.57573e-05	5.50043	12.5433	466.635	542.02	-0.953384	206.512	-131.128	[2]
Yandong deposit	diorite porphyry	339	YD-5501-99-2@22	334.926	0.0511092		0.00181474		0.282848	2.40925e-05	2.68336	9.65258	585.506	726.703	-0.945339	391.777	-250.58	[2]
Yandong deposit	diorite porphyry	339	YD-5501-99-2@23	332.857	0.0425436		0.00143274		0.282909	3.49324e-05	4.83323	11.8451	492.284	584.719	-0.956845	251.862	-159.426	[2]
Yandong deposit	diorite porphyry	339	YD-5501-99-2@24	340.957	0.0549244		0.00187613		0.282906	3.73179e-05	4.74853	11.8314	501.712	591.872	-0.94349	250.915	-160.755	[2]
Yandong deposit	diorite porphyry	339	YD-5501-99-2@25	342.352	0.0418681		0.00139388		0.282896	3.8703e-05	4.40271	11.6239	509.225	606.256	-0.958016	263.904	-166.873	[2]
Fuxing deposit	plagiogranite porphyry	332	FX-1-01	332.6	0.041905		0.001785		0.283032	2.1e-05	9.2	16.1	318	310	− 0.95	-22.6	14.6	[3]
Fuxing deposit	plagiogranite porphyry	332	FX-1-02	325.8	0.024068		0.001062		0.282977	2.2e-05	7.3	14.2	390	428	− 0.97	102.2	-64.2	[3]
Fuxing deposit	plagiogranite porphyry	332	FX-1-03	328.1	0.029753		0.001351		0.283039	2e-05	9.4	16.4	304	290	− 0.96	-38.1	24.1	[3]
Fuxing deposit	plagiogranite porphyry	332	FX-1-04	328.9	0.034108		0.001549		0.283051	2.1e-05	9.9	16.8	289	266	− 0.95	-62.9	39.9	[3]
Fuxing deposit	plagiogranite porphyry	332	FX-1-05	334.5	0.034663		0.001514		0.28299	2.4e-05	7.7	14.7	376	400	− 0.95	65.5	-41.5	[3]
Fuxing deposit	plagiogranite porphyry	332	FX-1-06	334	0.05006		0.00208		0.283088	2.3e-05	11.2	18.1	238	186	− 0.94	-148	96	[3]
Fuxing deposit	plagiogranite porphyry	332	FX-1-07	332	0.041805		0.001842		0.283012	2.1e-05	8.5	15.4	348	356	− 0.94	24	-16	[3]
Fuxing deposit	plagiogranite porphyry	332	FX-1-08	342.2	0.040418		0.001806		0.283069	2.1e-05	10.5	17.6	265	221	− 0.95	-121.2	77.2	[3]
Fuxing deposit	plagiogranite porphyry	332	FX-1-09	330.9	0.034147		0.001522		0.283002	2.3e-05	8.1	15.1	359	376	− 0.95	45.1	-28.1	[3]
Fuxing deposit	plagiogranite porphyry	332	FX-1-10	331.9	0.026563		0.001223		0.282969	2.2e-05	7	14	403	445	− 0.96	113.1	-71.1	[3]
Fuxing deposit	plagiogranite porphyry	332	FX-1-11	332.8	0.030616		0.001367		0.283026	2.3e-05	9	16	323	318	− 0.96	-14.8	9.8	[3]
Fuxing deposit	plagiogranite porphyry	332	FX-1-12	333.1	0.043425		0.001878		0.283031	2.5e-05	9.2	16.1	320	313	− 0.94	-20.1	13.1	[3]
Fuxing deposit	plagiogranite porphyry	332	FX-1-13	325.2	0.043008		0.00192		0.283031	2.2e-05	9.2	15.9	320	317	− 0.94	-8.2	5.2	[3]
Fuxing deposit	plagiogranite porphyry	332	FX-1-14	334.2	0.054068		0.002304		0.283096	2.3e-05	11.5	18.3	227	169	− 0.93	-165.2	107.2	[3]
Fuxing deposit	plagiogranite porphyry	332	FX-1-15	334.6	0.0428		0.001829		0.283038	2.2e-05	9.4	16.4	309	295	− 0.94	-39.6	25.6	[3]
Fuxing deposit	monzogranite	328	FX-3-01	329.9	0.038909		0.001684		0.282974	1.7e-05	7.2	14.1	400	441	− 0.95	111.1	-70.1	[3]
Fuxing deposit	monzogranite	328	FX-3-02	318.7	0.031142		0.001378		0.282987	1.7e-05	7.6	14.3	379	414	− 0.96	95.3	-60.3	[3]
Fuxing deposit	monzogranite	328	FX-3-03	322.4	0.065612		0.002689		0.28291	1.9e-05	4.9	11.4	508	605	− 0.92	282.6	-185.6	[3]
Fuxing deposit	monzogranite	328	FX-3-04	324.5	0.036169		0.001566		0.282937	2.1e-05	5.8	12.7	453	526	− 0.95	201.5	-128.5	[3]
Fuxing deposit	monzogranite	328	FX-3-05	332.5	0.038949		0.001694		0.282975	2e-05	7.2	14.1	400	439	− 0.95	106.5	-67.5	[3]
Fuxing deposit	monzogranite	328	FX-3-06	342.8	0.049722		0.002134		0.28293	1.5e-05	5.6	12.7	470	541	− 0.94	198.2	-127.2	[3]
Fuxing deposit	monzogranite	328	FX-3-07	328.5	0.035604		0.001559		0.282962	1.8e-05	6.7	13.6	417	469	− 0.95	140.5	-88.5	[3]
Fuxing deposit	monzogranite	328	FX-3-08	329.9	0.035211		0.001542		0.282934	1.7e-05	5.7	12.6	458	531	− 0.95	201.1	-128.1	[3]
Fuxing deposit	monzogranite	328	FX-3-09	337.2	0.041559		0.001819		0.282924	1.8e-05	5.4	12.4	475	553	− 0.95	215.8	-137.8	[3]
Fuxing deposit	monzogranite	328	FX-3-10	332.7	0.038408		0.001696		0.282966	2.1e-05	6.9	13.8	413	459	− 0.95	126.3	-80.3	[3]
Fuxing deposit	monzogranite	328	FX-3-11	322.2	0.033855		0.001468		0.282969	1.9e-05	7	13.8	405	453	− 0.96	130.8	-82.8	[3]
Fuxing deposit	monzogranite	328	FX-3-12	329.9	0.036031		0.00159		0.282973	1.8e-05	7.1	14	401	442	− 0.95	112.1	-71.1	[3]
Fuxing deposit	monzogranite	328	FX-3-13	329.3	0.048698		0.002112		0.282952	1.6e-05	6.4	13.2	438	498	− 0.94	168.7	-108.7	[3]
Fuxing deposit	monzogranite	328	FX-3-14	326	0.052168		0.002245		0.282929	2.3e-05	5.6	12.2	473	554	− 0.93	228	-147	[3]
Fuxing deposit	monzogranite	328	FX-3-15	325.2	0.035126		0.001534		0.282978	1.9e-05	7.3	14.1	394	434	− 0.95	108.8	-68.8	[3]
Yandong deposit	tonalite	335	YD2-4703-10@02	344.15	0.0611681		0.00239121		0.282864	2.54141e-05	3.25394	10.2848	571.088	693.372	-0.927976	349.222	-226.938	[2]
Yandong deposit	tonalite	335	YD2-4703-10@03	340.867	0.0527776		0.00207477		0.282945	2.42686e-05	6.111	13.1482	448.137	507.389	-0.937507	166.522	-107.27	[2]
Yandong deposit	tonalite	335	YD2-4703-10@04	342.519	0.0557682		0.00217443		0.282898	2.49266e-05	4.46946	11.517	517.381	613.224	-0.934505	270.705	-174.862	[2]
Yandong deposit	tonalite	335	YD2-4703-10@05	331.414	0.0529963		0.0020385		0.282921	2.55691e-05	5.28043	12.129	481.989	565.395	-0.938599	233.981	-150.575	[2]
Yandong deposit	tonalite	335	YD2-4703-10@06	335.999	0.0526846		0.00194496		0.282905	3.78402e-05	4.69965	11.6638	504.666	598.768	-0.941417	262.769	-168.667	[2]
Yandong deposit	tonalite	335	YD2-4703-10@08	334.336	0.0562299		0.00214353		0.282925	2.49836e-05	5.42577	12.3118	477.362	555.944	-0.935436	221.608	-143.026	[2]
Yandong deposit	tonalite	335	YD2-4703-10@09	334.183	0.0593403		0.00229622		0.282894	2.21286e-05	4.32304	11.1713	525.2	628.904	-0.930837	294.721	-191.017	[2]
Yandong deposit	tonalite	335	YD2-4703-10@12	331.721	0.0530895		0.00202522		0.282872	2.72748e-05	3.52788	10.3845	554.085	677.381	-0.938999	345.66	-222.363	[2]
Yandong deposit	tonalite	335	YD2-4703-10@13	331.929	0.0513142		0.00198111		0.282941	2.17856e-05	5.99211	12.8646	451.893	518.636	-0.940328	186.707	-119.963	[2]
Yandong deposit	tonalite	335	YD2-4703-10@14	332.467	0.0632885		0.00236162		0.282912	3.10378e-05	4.94499	11.744	500.26	590.885	-0.928867	258.419	-167.793	[2]
Yandong deposit	tonalite	335	YD2-4703-10@15	330.454	0.0541387		0.00205211		0.283077	2.83769e-05	10.7838	17.6135	254.423	212.352	-0.938189	-118.102	76.0311	[2]
Yandong deposit	tonalite	335	YD-10-1.1	353	0.135441		0.002167		0.283001	2.6e-05	8.1	15.4	367	375	-0.93	22	-14	[4]
Yandong deposit	tonalite	335	YD-10-2.1	334	0.165288		0.002603		0.283009	2.3e-05	8.4	15.2	359	372	-0.92	38	-25	[4]
Yandong deposit	tonalite	335	YD-I0-3.1	332	0.14596		0.00251		0.282943	2.4e-05	6.1	12.8	456	522	-0.92	190	-124	[4]
Yandong deposit	tonalite	335	YD-10-4.1	341	0.164177		0.002761		0.28298	2.7e-05	7.4	14.2	404	437	-0.92	96	-63	[4]
Yandong deposit	tonalite	335	YD-10-5.1	333	0.188134		0.003645		0.282986	2.3e-05	7.6	14.1	405	441	-0.89	108	-72	[4]
Yandong deposit	tonalite	335	YD-10-6.1	345	0.175497		0.002828		0.282842	3.2e-05	2.5	9.4	611	750	-0.91	405	-266	[4]
Yandong deposit	tonalite	335	YD-10-7.1	331	0.241981		0.004668		0.283016	2.6e-05	8.6	14.9	371	388	-0.86	57	-40	[4]
Yandong deposit	tonalite	335	YD-10-8.1	333	0.160006		0.002841		0.283028	2.4e-05	9.1	15.8	333	334	-0.91	1	0	[4]
Yandong deposit	tonalite	335	YD-10-9.1	343	0.161865		0.002905		0.283015	2.3e-05	8.6	15.5	353	358	-0.91	15	-10	[4]
Yandong deposit	tonalite	335	YD-10-10.1	330	0.096833		0.001895		0.282951	2.1e-05	6.3	13.2	438	498	-0.94	168	-108	[4]
Yandong deposit	tonalite	335	YD-10-I1.1	330	0.145248		0.002434		0.282982	2.7e-05	7.4	14.2	397	433	-0.93	103	-67	[4]
Yandong deposit	tonalite	335	YD-10-12.1	338	0.162725		0.003599		0.282953	2.9e-05	6.4	13	455	512	-0.89	174	-117	[4]
Yandong deposit	tonalite	335	YD-10-13.I	324	0.141374		0.002375		0.282973	3.3e-05	7.1	13.7	411	458	-0.93	134	-87	[4]
Yandong deposit	tonalite	335	YD-10-14.1	345	0.155443		0.003396		0.282873	3e-05	3.6	10.4	575	688	-0.9	343	-230	[4]
Yandong deposit	tonalite	335	YD-10-15.1	327	0.56119		0.011466		0.28304	5.3e-05	9.5	14.2	416	430	-0.65	103	-89	[4]
Tuwu deposit	tonalitic rock	332	TW702-59-1	321.3	0.114568		0.002015		0.28295	1.7e-05	6.3	12.9	440	506	−0.94	184.7	-118.7	[5]
Tuwu deposit	tonalitic rock	332	TW702-59-2	340	0.182536		0.002969		0.283062	3.2e-05	10.3	17.1	283	254	−0.91	-86	57	[5]
Tuwu deposit	tonalitic rock	332	TW702-59-3	335.3	0.129431		0.002314		0.282976	2.4e-05	7.2	14.1	404	442	−0.93	106.7	-68.7	[5]
Tuwu deposit	tonalitic rock	332	TW702-59-4	323.6	0.133702		0.002231		0.282924	2.6e-05	5.4	12	480	565	−0.93	241.4	-156.4	[5]
Tuwu deposit	tonalitic rock	332	TW702-59-5	348.6	0.158374		0.003386		0.282978	2.4e-05	7.3	14.2	414	447	−0.90	98.4	-65.4	[5]
Tuwu deposit	tonalitic rock	332	TW702-59-6	333.1	0.219734		0.003329		0.283073	2.9e-05	10.6	17.2	270	239	−0.90	-94.1	63.1	[5]
Tuwu deposit	tonalitic rock	332	TW702-59-7	331.3	0.168966		0.002821		0.283004	2.6e-05	8.2	14.9	369	388	−0.92	56.7	-37.7	[5]
Tuwu deposit	tonalitic rock	332	TW702-59-8	320.3	0.234525		0.005592		0.283032	2.7e-05	9.2	15.1	354	368	−0.83	47.7	-33.7	[5]
Tuwu deposit	tonalitic rock	332	TW702-59-9	352.7	0.209396		0.00498		0.283081	2.5e-05	10.9	17.5	270	235	−0.85	-117.7	82.7	[5]
Tuwu deposit	tonalitic rock	332	TW702-59-10	339	0.203264		0.004839		0.283024	2.9e-05	8.9	15.3	359	368	−0.85	29	-20	[5]
Tuwu deposit	tonalitic rock	332	TW702-59-11	354.8	0.200718		0.004854		0.282877	3e-05	3.7	10.4	593	696	−0.85	341.2	-238.2	[5]
Tuwu deposit	tonalitic rock	332	TW702-59-12	350.3	0.184403		0.003207		0.282957	2.4e-05	6.5	13.5	444	491	−0.90	140.7	-93.7	[5]
Tuwu deposit	tonalitic rock	332	TW702-59-13	335.2	0.278384		0.00629		0.282798	0.000154	0.9	6.9	748	902	−0.81	566.8	-412.8	[5]
Tuwu deposit	tonalitic rock	332	TW702-59-14	333.2	0.159034		0.00321		0.28295	3.2e-05	6.3	12.9	455	516	−0.90	182.8	-121.8	[5]
Tuwu deposit	tonalitic rock	332	TW702-59-15	353.8	0.231309		0.005216		0.282867	4e-05	3.4	9.9	615	724	−0.84	370.2	-261.2	[5]
Tuwu deposit	tonalitic rock	335	TW-005-01	331.7	0.08331		0.002515		0.282792	6.3e-05	0.7	7.4	680	865	-0.92	533.3	-348.3	[6]
Tuwu deposit	tonalitic rock	335	TW-005-02	334.1	0.081412		0.002188		0.282981	3.7e-05	7.4	14.3	396	431	-0.93	96.9	-61.9	[6]
Tuwu deposit	tonalitic rock	335	TW-005-03	325.3	0.107147		0.002411		0.282902	5.2e-05	4.6	11.2	516	619	-0.93	293.7	-190.7	[6]
Tuwu deposit	tonalitic rock	335	TW-005-04	336.5	0.09094		0.003311		0.283222	0.000122	15.9	22.6	42	104	-0.9	-232.5	294.5	[6]
Tuwu deposit	tonalitic rock	335	TW-005-05	336.8	0.06661		0.002157		0.282853	3.5e-05	2.9	9.8	584	719	-0.94	382.2	-247.2	[6]
Tuwu deposit	tonalitic rock	335	TW-005-06	351	0.130745		0.004249		0.28302	4.2e-05	8.8	15.5	360	364	-0.87	13	-9	[6]
Tuwu deposit	tonalitic rock	335	TW-005-07	331.6	0.073937		0.002257		0.282922	4.5e-05	5.3	12.1	484	566	-0.93	234.4	-152.4	[6]
Tuwu deposit	tonalitic rock	335	TW-005-08	339.9	0.072102		0.00211		0.282865	3.6e-05	3.3	10.3	565	689	-0.94	349.1	-225.1	[6]
Tuwu deposit	tonalitic rock	335	TW-005-09	304.5	0.073916		0.001963		0.282815	4.6e-05	1.5	7.8	636	820	-0.94	515.5	-331.5	[6]
Tuwu deposit	tonalitic rock	335	TW-00540	335	0.062855		0.001921		0.282822	3.2e-05	1.8	8.7	624	786	-0.94	451	-289	[6]
Tuwu deposit	tonalitic rock	335	TW-00541	332	0.07783		0.002167		0.283035	3.5e-05	9.3	16.1	317	308	-0.93	-24	15	[6]
Tuwu deposit	tonalitic rock	335	TW-00542	334.9	0.062525		0.002177		0.282757	5.7e-05	-0.5	6.3	725	938	-0.93	603.1	-390.1	[6]
Tuwu deposit	tonalitic rock	335	TW-00543	334.8	0.066622		0.002029		0.283017	4e-05	8.7	15.6	342	346	-0.94	11.2	-7.2	[6]
Tuwu deposit	tonalitic rock	335	TW-00544	338	0.068293		0.00209		0.283022	3.8e-05	8.8	15.8	336	334	-0.94	-4	2	[6]
Tuwu deposit	tonalitic rock	335	TW-00545	334.6	0.045253		0.001534		0.282876	3.7e-05	3.7	10.7	541	660	-0.95	325.4	-206.4	[6]
Yandong deposit	plagiogranite porphyry	333	YD-01	333	0.042637		0.001895		0.282964	2.3e-05	6.8	13.8	417	438	-0.94	105	-84	[7]
Yandong deposit	plagiogranite porphyry	333	YD-02	333	0.078345		0.003156		0.282949	1.7e-05	6.3	13	456	481	-0.9	148	-123	[7]
Yandong deposit	plagiogranite porphyry	333	YD-03	333	0.04753		0.001979		0.282952	1.7e-05	6.4	13.4	436	461	-0.94	128	-103	[7]
Yandong deposit	plagiogranite porphyry	333	YD-04	333	0.078239		0.003217		0.282947	1.7e-05	6.2	12.9	459	484	-0.9	151	-126	[7]
Yandong deposit	plagiogranite porphyry	333	YD-06	333	0.106798		0.004247		0.282914	1.7e-05	5	11.5	525	557	-0.87	224	-192	[7]
Yandong deposit	plagiogranite porphyry	333	YD-07	333	0.02352		0.001016		0.282937	1.7e-05	5.8	13	447	478	-0.97	145	-114	[7]
Yandong deposit	plagiogranite porphyry	333	YD-08	333	0.046368		0.001959		0.282966	1.5e-05	6.9	13.9	416	435	-0.94	102	-83	[7]
Yandong deposit	plagiogranite porphyry	333	YD-09	333	0.128198		0.004842		0.283009	1.9e-05	8.4	14.7	383	390	-0.85	57	-50	[7]
Yandong deposit	plagiogranite porphyry	333	YD-10	333	0.022626		0.001068		0.282927	1.6e-05	5.5	12.7	462	497	-0.97	164	-129	[7]
Yandong deposit	plagiogranite porphyry	333	YD-11	333	0.038044		0.001607		0.282907	1.7e-05	4.8	11.8	497	539	-0.95	206	-164	[7]
Yandong deposit	plagiogranite porphyry	333	YD-12	333	0.086651		0.003486		0.28294	1.6e-05	5.9	12.6	473	500	-0.9	167	-140	[7]
Yandong deposit	plagiogranite porphyry	333	YD-13	333	0.080863		0.003325		0.282967	1.6e-05	6.9	13.6	431	450	-0.9	117	-98	[7]
Yandong deposit	plagiogranite porphyry	333	YD-14	333	0.03665		0.001555		0.282965	1.7e-05	6.8	13.9	412	432	-0.95	99	-79	[7]
Yandong deposit	plagiogranite porphyry	333	YD-15	333	0.053006		0.002208		0.282907	1.5e-05	4.8	11.7	506	547	-0.93	214	-173	[7]
Yandong deposit	plagiogranite porphyry	333	YD-16	333	0.100892		0.003885		0.282945	1.6e-05	6.1	12.7	471	495	-0.88	162	-138	[7]
Yandong deposit	plagiogranite porphyry	333	YD-17	333	0.139658		0.00521		0.282989	1.6e-05	7.7	13.9	420	431	-0.84	98	-87	[7]
Yandong deposit	plagiogranite porphyry	333	YD-18	333	0.040468		0.00173		0.282945	1.9e-05	6.1	13.2	443	470	-0.95	137	-110	[7]
Yandong deposit	plagiogranite porphyry	333	YD-19	333	0.04258		0.001777		0.282927	1.8e-05	5.5	12.5	470	504	-0.95	171	-137	[7]
Yandong deposit	plagiogranite porphyry	333	YD-20	333	0.099095		0.00383		0.28294	1.8e-05	5.9	12.5	478	504	-0.88	171	-145	[7]
Tuwu deposit	plagiogranite porphyry	333	TW-01	333	0.037032		0.001629		0.282977	1.9e-05	7.3	14.4	396	407	-0.95	74	-63	[7]
Tuwu deposit	plagiogranite porphyry	333	TW-02	333	0.041951		0.00182		0.282951	1.9e-05	6.3	13.4	436	456	-0.95	123	-103	[7]
Tuwu deposit	plagiogranite porphyry	333	TW-03	333	0.041643		0.001783		0.282949	1.8e-05	6.3	13.3	438	458	-0.95	125	-105	[7]
Tuwu deposit	plagiogranite porphyry	333	TW-04	333	0.033176		0.001411		0.282966	1.7e-05	6.9	14	410	425	-0.96	92	-77	[7]
Tuwu deposit	plagiogranite porphyry	333	TW-05	333	0.031756		0.001401		0.282928	1.8e-05	5.5	12.7	464	491	-0.96	158	-131	[7]
Tuwu deposit	plagiogranite porphyry	333	TW-06	333	0.02814		0.001241		0.282962	1.9e-05	6.7	13.9	414	430	-0.96	97	-81	[7]
Tuwu deposit	plagiogranite porphyry	333	TW-07	333	0.027006		0.001207		0.282915	1.7e-05	5.1	12.3	480	511	-0.96	178	-147	[7]
Tuwu deposit	plagiogranite porphyry	333	TW-08	333	0.032088		0.001418		0.282949	2e-05	6.3	13.4	434	455	-0.96	122	-101	[7]
Tuwu deposit	plagiogranite porphyry	333	TW-09	333	0.038649		0.001693		0.282922	1.8e-05	5.3	12.4	476	504	-0.95	171	-143	[7]
Tuwu deposit	plagiogranite porphyry	333	TW-10	333	0.020435		0.000902		0.282932	1.8e-05	5.7	12.9	452	477	-0.97	144	-119	[7]
Tuwu deposit	plagiogranite porphyry	333	TW-11	333	0.052865		0.002294		0.282952	1.9e-05	6.4	13.3	440	460	-0.93	127	-107	[7]
Tuwu deposit	plagiogranite porphyry	333	TW-12	333	0.034012		0.001499		0.282939	1.8e-05	5.9	13	449	473	-0.95	140	-116	[7]
Tuwu deposit	plagiogranite porphyry	333	TW-13	333	0.032389		0.001423		0.283012	1.8e-05	8.5	15.6	343	344	-0.96	11	-10	[7]
Tuwu deposit	plagiogranite porphyry	333	TW-14	333	0.020258		0.000919		0.282902	1.9e-05	4.6	11.9	495	529	-0.97	196	-162	[7]
Tuwu deposit	plagiogranite porphyry	333	TW-15	333	0.049226		0.002094		0.282946	1.9e-05	6.1	13.1	447	469	-0.94	136	-114	[7]
Tuwu deposit	plagiogranite porphyry	333	TW-16	333	0.042891		0.00183		0.282955	1.8e-05	6.5	13.5	431	450	-0.94	117	-98	[7]
Tuwu deposit	plagiogranite porphyry	333	TW-17	333	0.030606		0.001354		0.28294	1.7e-05	5.9	13.1	447	469	-0.96	136	-114	[7]
Tuwu deposit	plagiogranite porphyry	333	TW-18	333	0.033929		0.001466		0.282952	1.7e-05	6.4	13.5	430	449	-0.96	116	-97	[7]
Tuwu deposit	plagiogranite porphyry	333	TW-19	333	0.032489		0.001436		0.282971	1.8e-05	7	14.2	403	417	-0.96	84	-70	[7]
Tuwu deposit	plagiogranite porphyry	333	TW-20	333	0.034008		0.001489		0.282929	1.7e-05	5.6	12.7	463	489	-0.96	156	-130	[7]
Tuwu deposit	plagiogranite porphyry	333	TW-21	333	0.022354		0.001034		0.28293	1.7e-05	5.6	12.8	457	483	-0.97	150	-124	[7]
Tuwu deposit	plagiogranite porphyry	333	TW-22	333	0.026605		0.001196		0.282927	1.7e-05	5.5	12.7	463	489	-0.96	156	-130	[7]
Tuwu deposit	plagiogranite porphyry	333	TW-23	333	0.027099		0.001186		0.282933	1.9e-05	5.7	12.9	454	479	-0.96	146	-121	[7]
Tuwu deposit	plagiogranite porphyry	333	TW-24	333	0.025093		0.001132		0.282939	1.8e-05	5.9	13.1	446	469	-0.97	136	-113	[7]
Yandong deposit	medium-coarse quartz porphyry	328	YD2-004-1@01	316.917	0.045229		0.00195285		0.282901	1.84527e-05	4.56573	11.1312	510.288	618.106	-0.941179	301.189	-193.37	[2]
Yandong deposit	medium-coarse quartz porphyry	328	YD2-004-1@02	321.702	0.039131		0.00170142		0.282921	2.3168e-05	5.27703	11.9961	477.721	566.389	-0.948752	244.687	-156.019	[2]
Yandong deposit	medium-coarse quartz porphyry	328	YD2-004-1@03	323.947	0.0392304		0.0016946		0.283007	1.97508e-05	8.32333	15.0931	352.903	369.368	-0.948958	45.421	-28.9562	[2]
Yandong deposit	medium-coarse quartz porphyry	328	YD2-004-1@04	327.759	0.0403105		0.0017553		0.283013	2.05507e-05	8.50767	15.3443	345.917	356.194	-0.947129	28.4356	-18.1579	[2]
Yandong deposit	medium-coarse quartz porphyry	328	YD2-004-1@05	328.898	0.0466646		0.00201838		0.282944	1.8529e-05	6.08867	12.8901	448.367	514.646	-0.939205	185.748	-119.469	[2]
Yandong deposit	medium-coarse quartz porphyry	328	YD2-004-1@06	327.232	0.0336583		0.00149741		0.282931	1.97705e-05	5.6081	12.4875	461.622	539.17	-0.954897	211.938	-134.39	[2]
Yandong deposit	medium-coarse quartz porphyry	328	YD2-004-1@07	338.433	0.0448702		0.00193463		0.282948	2.00785e-05	6.23789	13.2561	441.195	498.573	-0.941728	160.14	-102.762	[2]
Yandong deposit	medium-coarse quartz porphyry	328	YD2-004-1@08	325.839	0.0333008		0.00148278		0.282979	1.81503e-05	7.30828	14.1627	392.241	430.599	-0.955338	104.76	-66.4021	[2]
Yandong deposit	medium-coarse quartz porphyry	328	YD2-004-1@09	328.501	0.0424395		0.00186513		0.282964	2.02292e-05	6.80437	13.6314	417.063	466.775	-0.943821	138.274	-88.5617	[2]
Yandong deposit	medium-coarse quartz porphyry	328	YD2-004-1@10	320.24	0.0465249		0.0020002		0.282954	2.15237e-05	6.42933	13.0551	434.086	497.333	-0.939753	177.093	-113.845	[2]
Yandong deposit	medium-coarse quartz porphyry	328	YD2-004-1@11	328.38	0.0416779		0.00179586		0.282926	1.81388e-05	5.44974	12.2883	471.865	552.831	-0.945908	224.451	-143.485	[2]
Yandong deposit	medium-coarse quartz porphyry	328	YD2-004-1@12	331.594	0.0276315		0.00124666		0.282985	1.77142e-05	7.54027	14.5683	380.368	409.035	-0.96245	77.4408	-48.7738	[2]
Yandong deposit	medium-coarse quartz porphyry	328	YD2-004-1@13	335.337	0.0447758		0.00193135		0.282937	2.19623e-05	5.84598	12.8002	457.296	525.41	-0.941827	190.073	-121.96	[2]
Yandong deposit	medium-coarse quartz porphyry	328	YD2-004-1@14	324.035	0.0376121		0.00166986		0.282955	1.83255e-05	6.46085	13.2364	428.908	488.651	-0.949703	164.616	-104.873	[2]
Yandong deposit	medium-coarse quartz porphyry	328	YD2-004-1@15	330.557	0.0281584		0.00121401		0.283007	2.00139e-05	8.31703	15.3307	348.612	359.249	-0.963433	28.6916	-18.0547	[2]
Yandong deposit	fine-grained quartz porphyry	326	YD2-004-3@01	330.382	0.0352966		0.00157472		0.282982	1.75008e-05	7.42398	14.3543	388.493	421.833	-0.952569	91.4515	-58.1111	[2]
Yandong deposit	fine-grained quartz porphyry	326	YD2-004-3@02	324.738	0.039194		0.00171112		0.282957	1.91402e-05	6.55559	13.3371	425.509	482.737	-0.94846	157.999	-100.771	[2]
Yandong deposit	fine-grained quartz porphyry	326	YD2-004-3@03	332.983	0.029959		0.00141396		0.282966	1.76493e-05	6.85878	13.8789	409.784	454.375	-0.957411	121.392	-76.8012	[2]
Yandong deposit	fine-grained quartz porphyry	326	YD2-004-3@04	330.596	0.0420291		0.00182286		0.282978	1.81096e-05	7.26808	14.1484	397.527	435.218	-0.945094	104.622	-66.9314	[2]
Yandong deposit	fine-grained quartz porphyry	326	YD2-004-3@05	329.302	0.0488626		0.00208488		0.283013	1.81795e-05	8.52979	15.3268	348.129	358.521	-0.937202	29.2191	-18.8275	[2]
Yandong deposit	fine-grained quartz porphyry	326	YD2-004-3@06	319.733	0.0332796		0.00147031		0.282966	1.88152e-05	6.8678	13.5956	410.04	462.255	-0.955713	142.521	-90.3063	[2]
Yandong deposit	fine-grained quartz porphyry	326	YD2-004-3@07	329.383	0.0462037		0.00200942		0.282982	2.0168e-05	7.41957	14.2339	393.299	428.782	-0.939475	99.399	-63.9157	[2]
Yandong deposit	fine-grained quartz porphyry	326	YD2-004-3@08	325.281	0.0411381		0.00178939		0.282993	1.86231e-05	7.808	14.5849	374.989	403.052	-0.946103	77.7711	-49.7079	[2]
Yandong deposit	fine-grained quartz porphyry	326	YD2-004-3@09	320.452	0.0350584		0.00159167		0.282954	1.68411e-05	6.43507	13.152	429.053	491.282	-0.952058	170.83	-108.601	[2]
Yandong deposit	fine-grained quartz porphyry	326	YD2-004-3@10	325.694	0.0315749		0.00139572		0.282954	1.97617e-05	6.43408	13.3036	426.83	485.629	-0.95796	159.935	-101.136	[2]
Yandong deposit	fine-grained quartz porphyry	326	YD2-004-3@11	321.29	0.0419623		0.0018265		0.282927	1.8498e-05	5.46962	12.1535	471.442	555.974	-0.944985	234.684	-150.152	[2]
Yandong deposit	fine-grained quartz porphyry	326	YD2-004-3@12	326.624	0.042684		0.00184684		0.28293	2.00746e-05	5.59586	12.3868	466.518	545.154	-0.944372	218.53	-139.895	[2]
Yandong deposit	fine-grained quartz porphyry	326	YD2-004-3@13	331.108	0.0415446		0.00181337		0.282937	2.15128e-05	5.83769	12.7298	456.168	526.644	-0.94538	195.536	-125.06	[2]
Yandong deposit	fine-grained quartz porphyry	326	YD2-004-3@14	324.621	0.0461462		0.00197677		0.282967	1.84072e-05	6.87872	13.6008	415.268	465.719	-0.940459	141.098	-90.6477	[2]
Yandong deposit	fine-grained quartz porphyry	326	YD2-004-3@15	321.693	0.0439989		0.00190091		0.282952	1.88838e-05	6.36847	13.0455	435.415	499.076	-0.942744	177.384	-113.722	[2]
Linglong deposit	quartz albite porphyry	319	L-1201-1@01	312.7	0.085256		0.003523		0.282884	2e-05	4	10.1	559	680	−0.89	367.3	-246.3	[8]
Linglong deposit	quartz albite porphyry	319	L-1201-1@02	321.8	0.050555		0.002154		0.282877	2e-05	3.7	10.3	549	674	−0.94	352.2	-227.2	[8]
Linglong deposit	quartz albite porphyry	319	L-1201-1@03	316.5	0.043889		0.001947		0.28298	2.4e-05	7.3	13.9	396	440	−0.94	123.5	-79.5	[8]
Linglong deposit	quartz albite porphyry	319	L-1201-1@04	318.2	0.050983		0.00217		0.282942	2.6e-05	6	12.6	453	526	−0.93	207.8	-134.8	[8]
Linglong deposit	quartz albite porphyry	319	L-1201-1@05	301.6	0.035679		0.001526		0.282976	2e-05	7.2	13.5	397	452	−0.95	150.4	-95.4	[8]
Linglong deposit	quartz albite porphyry	319	L-1201-1@06	296.9	0.05623		0.002401		0.28297	2.3e-05	7	13.1	414	478	−0.93	181.1	-117.1	[8]
Linglong deposit	quartz albite porphyry	319	L-1201-1@07	313.3	0.053851		0.002256		0.282909	2.1e-05	4.8	11.3	504	607	−0.93	293.7	-190.7	[8]
Linglong deposit	quartz albite porphyry	319	L-1201-1@08	329.8	0.081856		0.003391		0.282905	2e-05	4.7	11.2	526	623	−0.90	293.2	-196.2	[8]
Linglong deposit	quartz albite porphyry	319	L-1201-1@09	308	0.051194		0.002126		0.282903	1.9e-05	4.7	11	509	620	−0.94	312	-201	[8]
Linglong deposit	quartz albite porphyry	319	L-1201-1@10	329.7	0.051501		0.002167		0.282902	2.1e-05	4.6	11.4	513	613	−0.93	283.3	-183.3	[8]
Linglong deposit	quartz albite porphyry	319	L-1201-1@11	314.5	0.043886		0.001854		0.282979	2.2e-05	7.3	13.8	396	442	−0.94	127.5	-81.5	[8]
Linglong deposit	quartz albite porphyry	319	L-1201-1@12	325.4	0.075439		0.003071		0.282841	2.1e-05	2.5	9	616	764	−0.91	438.6	-290.6	[8]
Linglong deposit	quartz albite porphyry	319	L-1201-1@13	317.4	0.064962		0.002673		0.282868	2.5e-05	3.4	9.8	570	703	−0.92	385.6	-252.6	[8]
Linglong deposit	quartz albite porphyry	319	L-1201-1@14	315.4	0.058243		0.002403		0.282877	2.2e-05	3.7	10.1	553	680	−0.93	364.6	-237.6	[8]
Linglong deposit	quartz albite porphyry	319	L-1201-1@15	293.5	0.047585		0.002015		0.282912	2.3e-05	4.9	11	496	608	−0.94	314.5	-202.5	[8]
Chihu deposit	granodiorite	320	CH-9@01	319.7	0.02711		0.001128		0.282946	2.3e-05	6.2	13	435	503	-0.97	183.3	-115.3	[9]
Chihu deposit	granodiorite	320	CH-9@02	326	0.052942		0.002117		0.283004	2.9e-05	8.2	14.9	362	383	-0.94	57	-36	[9]
Chihu deposit	granodiorite	320	CH-9@03	311.8	0.033932		0.001415		0.282961	2.4e-05	6.7	13.3	417	477	-0.96	165.2	-105.2	[9]
Chihu deposit	granodiorite	320	CH-9@04	320.9	0.034118		0.00138		0.282913	2.2e-05	5	11.8	485	580	-0.96	259.1	-164.1	[9]
Chihu deposit	granodiorite	320	CH-9@05	321	0.036463		0.001498		0.282956	2.3e-05	6.5	13.3	425	485	-0.95	164	-104	[9]
Chihu deposit	granodiorite	320	CH-9@06	327.5	0.035976		0.001455		0.282928	2.5e-05	5.5	12.4	465	544	-0.96	216.5	-137.5	[9]
Chihu deposit	granodiorite	320	CH-9@07	325.7	0.038317		0.00155		0.282918	2e-05	5.2	12	481	570	-0.95	244.3	-155.3	[9]
Chihu deposit	granodiorite	320	CH-9@08	322.6	0.031843		0.001304		0.282946	2e-05	6.2	13	437	504	-0.96	181.4	-114.4	[9]
Chihu deposit	granodiorite	320	CH-9@09	314.9	0.032631		0.001307		0.282908	1.9e-05	4.8	11.5	491	594	-0.96	279.1	-176.1	[9]
Chihu deposit	granodiorite	320	CH-9@10	315.7	0.031484		0.001294		0.28292	2e-05	5.2	11.9	474	567	-0.96	251.3	-158.3	[9]
Chihu deposit	granodiorite	320	CH-9@11	318.7	0.032187		0.001333		0.282966	2.2e-05	6.9	13.6	409	462	-0.96	143.3	-90.3	[9]
Chihu deposit	granodiorite	320	CH-9@12	316.9	0.028489		0.001187		0.282965	2e-05	6.8	13.5	409	463	-0.96	146.1	-92.1	[9]
Chihu deposit	granodiorite	320	CH-9@13	316.7	0.028025		0.001141		0.282933	2.2e-05	5.7	12.4	453	534	-0.97	217.3	-136.3	[9]
Chihu deposit	granodiorite	320	CH-9@14	322.3	0.037218		0.001499		0.28298	2.1e-05	7.4	14.1	390	430	-0.95	107.7	-67.7	[9]
Chihu deposit	granodiorite	320	CH-9@15	326.2	0.043141		0.001714		0.282992	2.3e-05	7.8	14.6	376	404	-0.95	77.8	-49.8	[9]
Chihu deposit	porphyritic granodiorite	314	CH00112@01	330.7	0.036319		0.00168		0.282988	2.3e-05	7.6	14.6	381	409	-0.95	78.3	-50.3	[9]
Chihu deposit	porphyritic granodiorite	314	CH00112@02	308.1	0.033931		0.001559		0.282982	2.1e-05	7.4	13.9	388	434	-0.95	125.9	-79.9	[9]
Chihu deposit	porphyritic granodiorite	314	CH00112@03	313.2	0.025098		0.001174		0.28299	2.4e-05	7.7	14.4	373	408	-0.96	94.8	-59.8	[9]
Chihu deposit	porphyritic granodiorite	314	CH00112@04	310.4	0.028847		0.001355		0.282947	2.3e-05	6.2	12.8	436	509	-0.96	198.6	-125.6	[9]
Chihu deposit	porphyritic granodiorite	314	CH00112@05	315.5	0.02554		0.001171		0.283038	2.3e-05	9.4	16.1	304	297	-0.96	-18.5	11.5	[9]
Chihu deposit	porphyritic granodiorite	314	CH00112@06	324.5	0.03265		0.001522		0.283007	2.2e-05	8.3	15.1	351	366	-0.95	41.5	-26.5	[9]
Chihu deposit	porphyritic granodiorite	314	CH00112@07	314.9	0.026044		0.001217		0.282983	2.2e-05	7.4	14.1	384	424	-0.96	109.1	-69.1	[9]
Chihu deposit	porphyritic granodiorite	314	CH00112@08	313	0.032337		0.001484		0.283029	2.4e-05	9.1	15.7	319	323	-0.96	10	-6	[9]
Chihu deposit	porphyritic granodiorite	314	CH00112@09	313.7	0.033172		0.001525		0.283034	2.4e-05	9.3	15.8	313	313	-0.95	-0.7	0.7	[9]
Chihu deposit	porphyritic granodiorite	314	CH00112@10	316.9	0.033419		0.001585		0.283034	2.2e-05	9.3	15.9	314	312	-0.95	-4.9	2.9	[9]
Chihu deposit	porphyritic granodiorite	314	CH00112@11	311.1	0.031655		0.001476		0.283066	2.3e-05	10.4	17	266	240	-0.96	-71.1	45.1	[9]
Northeast of Chihu	K-feldspar granite	311	X3ET459-01	317.5	0.053518	0.000243	0.001869	1.7e-05	0.282944	1.2e-05	6.09	12.7	447	518	-0.94	200.5	-129.5	[1]
Northeast of Chihu	K-feldspar granite	311	X3ET459-02	311.8	0.040605	0.000416	0.001522	1.9e-05	0.28281	1.4e-05	1.33	7.87	636	820	-0.95	508.2	-324.2	[1]
Northeast of Chihu	K-feldspar granite	311	X3ET459-03	308.7	0.052393	0.000193	0.001886	1.7e-05	0.28283	1.1e-05	2.07	8.47	612	780	-0.94	471.3	-303.3	[1]
Northeast of Chihu	K-feldspar granite	311	X3ET459-04	321	0.039642	0.000146	0.001425	1e-05	0.282857	1e-05	2.99	9.75	567	708	-0.96	387	-246	[1]
Northeast of Chihu	K-feldspar granite	311	X3ET459-05	296.3	0.082456	0.001449	0.0027	3.9e-05	0.282974	1e-05	7.14	13.1	413	473	-0.92	176.7	-116.7	[1]
Northeast of Chihu	K-feldspar granite	311	X3ET459-06	308.6	0.040251	0.000174	0.001402	1.1e-05	0.282956	1.1e-05	6.5	13	424	491	-0.96	182.4	-115.4	[1]
Northeast of Chihu	K-feldspar granite	311	X3ET459-07	301.6	0.055339	0.000652	0.002107	2.9e-05	0.282797	1.7e-05	0.9	7.11	664	861	-0.94	559.4	-362.4	[1]
Northeast of Chihu	K-feldspar granite	311	X3ET459-08	314.7	0.115708	0.000563	0.004169	3.1e-05	0.282814	1.9e-05	1.5	7.55	677	843	-0.87	528.3	-362.3	[1]
Northeast of Chihu	K-feldspar granite	311	X3ET459-09	297.5	0.056924	0.000538	0.001925	2e-05	0.282886	1.1e-05	4.05	10.2	531	660	-0.94	362.5	-233.5	[1]
Northeast of Chihu	K-feldspar granite	311	X3ET459-10	314.5	0.067413	0.000178	0.002203	1.3e-05	0.2829	1.1e-05	4.53	11	515	624	-0.93	309.5	-200.5	[1]
Northeast of Chihu	K-feldspar granite	311	X3ET459-11	325.6	0.051185	0.000564	0.001709	2.1e-05	0.282899	8e-06	4.48	11.3	510	614	-0.95	288.4	-184.4	[1]
Northeast of Chihu	K-feldspar granite	311	X3ET459-12	316.9	0.059003	0.00083	0.002032	2.3e-05	0.282924	1.1e-05	5.37	11.9	478	567	-0.94	250.1	-161.1	[1]
Northeast of Chihu	K-feldspar granite	311	X3ET459-13	317.5	0.046128	9.7e-05	0.001542	8e-06	0.282867	9e-06	3.35	10	554	689	-0.95	371.5	-236.5	[1]
Northeast of Chihu	K-feldspar granite	311	X3ET459-14	316	0.036487	0.000263	0.001196	9e-06	0.2829	1e-05	4.54	11.2	501	609	-0.96	293	-185	[1]
Northeast of Chihu	K-feldspar granite	311	X3ET459-15	311.1	0.040935	0.000414	0.001523	1.8e-05	0.282808	1.4e-05	1.27	7.8	638	825	-0.95	513.9	-326.9	[1]
Northeast of Chihu	K-feldspar granite	311	X3ET459-16	318.5	0.0598	0.000684	0.00227	2.4e-05	0.282833	2.1e-05	2.16	8.7	615	774	-0.93	455.5	-296.5	[1]
Northeast of Chihu	K-feldspar granite	311	X3ET459-17	316.3	0.060032	0.000737	0.002098	3.6e-05	0.282893	1.2e-05	4.27	10.8	525	638	-0.94	321.7	-208.7	[1]
Northeast of Chihu	K-feldspar granite	311	X3ET459-18	318.6	0.037872	0.000163	0.001284	2e-06	0.282941	9e-06	5.98	12.7	444	516	-0.96	197.4	-125.4	[1]
Northeast of Chihu	K-feldspar granite	311	X3ET459-19	317.7	0.052014	0.000916	0.001833	3.9e-05	0.282882	1e-05	3.88	10.5	537	659	-0.94	341.3	-219.3	[1]
Northeast of Chihu	K-feldspar granite	311	X3ET459-20	307.9	0.042195	0.000138	0.00149	3e-06	0.282904	1.1e-05	4.67	11.1	500	609	-0.96	301.1	-192.1	[1]
Northeast of Chihu	K-feldspar granite	311	X3ET459-21	318.1	0.047275	0.000351	0.001699	2.1e-05	0.282915	1.4e-05	5.06	11.7	486	581	-0.95	262.9	-167.9	[1]
Fuxing deposit	granite	335	FX01.1	332	0.033877	0.000255	0.001514	1e-05	0.282882	3.2e-05	3.8	10.8	535	655	-0.95	323	-203	[10]
Fuxing deposit	granite	335	FX01.2	334	0.027173	0.00053	0.001258	2.4e-05	0.282914	2.4e-05	4.9	12	486	577	-0.96	243	-152	[10]
Fuxing deposit	granite	335	FX01.3	335	0.030097	0.000247	0.001363	1e-05	0.282886	3.3e-05	3.9	11	528	642	-0.96	307	-193	[10]
Fuxing deposit	granite	335	FX01.4	337	0.030051	0.000198	0.001335	7e-06	0.28289	2.6e-05	4.1	11.2	521	629	-0.96	292	-184	[10]
Fuxing deposit	granite	335	FX01.5	331	0.373623	0.00121	0.001637	4.8e-05	0.282869	2.7e-05	3.4	10.3	555	685	-0.95	354	-224	[10]
Fuxing deposit	granite	335	FX01.6	333	0.33764	0.000261	0.001517	1.2e-05	0.282867	2.9e-05	3.3	10.3	557	688	-0.95	355	-224	[10]
Fuxing deposit	granite	335	FX01.7	334	0.027671	0.00059	0.001249	2.3e-05	0.282871	2.7e-05	3.4	10.5	548	675	-0.96	341	-214	[10]
Fuxing deposit	granite	335	FX01.8	334	0.029465	0.0003	0.00133	1.3e-05	0.282967	2.7e-05	6.8	13.9	411	456	-0.96	122	-77	[10]
Fuxing deposit	granite	335	FX01.9	337	0.033957	0.000139	0.0015	6e-06	0.28279	2.6e-05	0.6	7.6	668	861	-0.95	524	-331	[10]
Fuxing deposit	granite	335	FX01.10	337	0.452149	0.000562	0.001992	2.3e-05	0.282866	4e-05	3.3	10.2	565	693	-0.94	356	-228	[10]
Fuxing deposit	granite	335	FX01.11	329	0.045413	0.000988	0.002017	4e-05	0.282869	1.7e-05	3.4	10.2	561	691	-0.94	362	-232	[10]
Fuxing deposit	granite	335	FX01.12	334	0.036833	0.000309	0.001634	1.5e-05	0.282875	2.6e-05	3.6	10.5	548	671	-0.95	337	-214	[10]
Fuxing deposit	granite	335	FX01.13	336	0.037795	0.00211	0.001604	8.6e-05	0.282905	3e-05	4.6	11.7	504	601	-0.95	265	-168	[10]
Fuxing deposit	granite	335	FX01.14	340	0.029359	0.000153	0.001343	7e-06	0.282966	2.6e-05	6.8	14	413	456	-0.96	116	-73	[10]
Fuxing deposit	granite	335	FX01.15	336	0.033879	0.000634	0.001493	2.8e-05	0.282938	2.9e-05	5.8	12.9	454	523	-0.96	187	-118	[10]
Fuxing deposit	granite	335	FX01.16	338	0.040707	0.000447	0.001802	1.8e-05	0.282811	3.2e-05	1.3	8.3	642	816	-0.95	478	-304	[10]
Fuxing deposit	granite	335	FX01.17	339	0.040959	0.000895	0.00178	3.5e-05	0.282911	3.2e-05	4.9	11.9	496	587	-0.95	248	-157	[10]
Fuxing deposit	granite	335	FX01.18	340	0.029345	0.000276	0.001311	1.1e-05	0.28292	2.7e-05	5.2	12.3	478	560	-0.96	220	-138	[10]
Fuxing deposit	granite	335	FX01.19	334	0.022089	0.000182	0.000995	9e-06	0.282879	2.4e-05	3.7	10.8	532	653	-0.97	319	-198	[10]
Fuxing deposit	granite	335	FX01.20	340	0.037319	0.000666	0.001612	2.9e-05	0.282911	2.8e-05	4.9	12	494	584	-0.95	244	-154	[10]
Fuxing deposit	granite	335	FX01.21	333	0.016655	0.000156	0.000773	7e-06	0.282879	2.6e-05	3.7	10.9	528	649	-0.98	316	-195	[10]
Fuxing deposit	granite	335	FX01.22	335	0.04681	0.000516	0.002046	2.2e-05	0.282885	3e-05	3.9	10.8	539	654	-0.94	319	-204	[10]
Fuxing deposit	granite	335	FX01.23	336	0.040701	0.000522	0.001786	2.1e-05	0.2829	2.8e-05	4.5	11.5	513	614	-0.95	278	-177	[10]
Fuxing deposit	granite	335	FX01.24	334	0.032855	0.000736	0.001469	3.2e-05	0.282892	2.2e-05	4.2	11.2	520	629	-0.96	295	-186	[10]
Fuxing deposit	granite	335	FX01.25	339	0.047692	0.000553	0.002115	2.3e-05	0.282955	2.7e-05	6.4	13.4	437	491	-0.94	152	-98	[10]
Fuxing deposit	granite	335	FX01.26	334	0.034065	0.000164	0.001508	7e-06	0.282902	2.6e-05	4.5	11.5	506	607	-0.95	273	-172	[10]
Fuxing deposit	granite	335	FX01.27	335	0.038605	0.000793	0.001689	3.2e-05	0.282984	2.8e-05	7.4	14.4	390	422	-0.95	87	-55	[10]
Fuxing deposit	granite	335	FX01.28	336	0.03061	0.000729	0.001346	3e-05	0.282906	2.6e-05	4.7	11.8	498	594	-0.96	258	-162	[10]
Fuxing deposit	granite	335	FX01.29	337	0.036893	0.00042	0.001577	2e-05	0.282851	3e-05	2.7	9.8	581	723	-0.95	386	-244	[10]
Fuxing deposit	granite	335	FX01.30	336	0.033751	0.000329	0.001495	1.5e-05	0.282889	2.7e-05	4.1	11.1	525	636	-0.95	300	-189	[10]
Nanhugebi	granite	313	KZ03.1	313	0.022013	0.000206	0.001056	1.1e-05	0.282899	2.7e-05	4.4	11.1	504	620	-0.97	307	-191	[10]
Nanhugebi	granite	313	KZ03.2	309	0.032336	0.000119	0.001448	4e-06	0.282869	1.8e-05	3.4	9.9	553	696	-0.96	387	-244	[10]
Nanhugebi	granite	313	KZ03.3	306	0.025635	0.000252	0.001225	1.1e-05	0.282821	2.8e-05	1.7	8.1	618	803	-0.96	497	-312	[10]
Nanhugebi	granite	313	KZ03.4	307	0.034955	0.000487	0.001581	2.2e-05	0.282929	2.7e-05	5.5	11.9	468	562	-0.95	255	-161	[10]
Nanhugebi	granite	313	KZ03.5	314	0.030903	0.000433	0.001381	1.7e-05	0.282889	3e-05	4.1	10.7	524	647	-0.96	333	-210	[10]
Nanhugebi	granite	313	KZ03.6	312	0.048145	0.00163	0.002095	6.5e-05	0.282825	3e-05	1.8	8.2	627	803	-0.94	491	-315	[10]
Nanhugebi	granite	313	KZ03.7	313	0.025324	0.000328	0.001198	1.7e-05	0.282871	3.2e-05	3.4	10.1	546	686	-0.96	373	-233	[10]
Nanhugebi	granite	313	KZ03.8	310	0.028443	0.000206	0.001277	8e-06	0.28293	2.5e-05	5.5	12.1	463	553	-0.96	243	-153	[10]
Nanhugebi	granite	313	KZ03.9	317	0.03286	0.000484	0.001471	1.8e-05	0.282821	2.6e-05	1.7	8.3	622	801	-0.96	484	-305	[10]
Nanhugebi	granite	313	KZ03.10	306	0.034998	0.00134	0.001488	5.3e-05	0.282884	2.6e-05	3.9	10.3	532	665	-0.96	359	-226	[10]
Nanhugebi	granite	313	KZ03.11	317	0.020828	0.00065	0.000947	2.8e-05	0.28292	2.6e-05	5.2	11.9	473	568	-0.97	251	-156	[10]
Nanhugebi	granite	313	KZ03.12	319	0.033029	0.000378	0.001432	1.6e-05	0.282925	2.5e-05	5.3	12.1	472	562	-0.96	243	-153	[10]
Nanhugebi	granite	313	KZ03.13	310	0.030047	0.000644	0.001422	3.1e-05	0.282789	5.8e-05	0.5	7.1	667	876	-0.96	566	-357	[10]
Nanhugebi	granite	313	KZ03.14	316	0.029574	0.000362	0.001325	1.6e-05	0.282903	2.5e-05	4.6	11.2	502	613	-0.96	297	-186	[10]
Nanhugebi	granite	313	KZ03.15	317	0.032925	0.000501	0.001523	2.2e-05	0.282865	2.8e-05	3.2	9.9	560	702	-0.95	385	-243	[10]
Nanhugebi	granite	313	KZ03.16	317	0.029292	0.000613	0.00138	2.7e-05	0.282892	2.5e-05	4.2	10.9	519	638	-0.96	321	-202	[10]
Nanhugebi	granite	313	KZ03.17	310	0.058599	0.00215	0.00257	9.2e-05	0.282836	3.3e-05	2.2	8.5	619	785	-0.92	475	-309	[10]
Nanhugebi	granite	313	KZ03.18	316	0.029863	0.000383	0.001356	1.5e-05	0.282901	2.8e-05	4.5	11.2	505	617	-0.96	301	-189	[10]
Nanhugebi	granite	313	KZ03.19	317	0.030109	0.000133	0.001377	6e-06	0.282903	2.7e-05	4.6	11.2	504	613	-0.96	296	-187	[10]
Nanhugebi	granite	313	KZ03.20	314	0.031327	0.000648	0.001481	3.1e-05	0.282887	2.6e-05	4	10.6	528	653	-0.96	339	-214	[10]
Nanhugebi	granite	313	KZ03.21	312	0.027351	0.000416	0.001276	1.9e-05	0.282845	3.2e-05	5.5	12.1	463	552	-0.96	240	-151	[10]
Nanhugebi	granite	313	KZ03.22	316	0.034436	0.00111	0.001572	4.6e-05	0.282858	2.7e-05	0.5	7.2	669	874	-0.95	558	-353	[10]
Dananhu area	granidiorite	311	D01.1	324	0.062947	0.000899	0.002547	3.2e-05	0.282919	3.2e-05	5.1	11.7	495	587	-0.92	263	-171	[10]
Dananhu area	granidiorite	311	D01.2	305	0.09895	0.000977	0.003728	3.5e-05	0.282991	4.1e-05	7.7	13.6	403	451	-0.89	146	-98	[10]
Dananhu area	granidiorite	311	D01.3	307	0.05865	0.00217	0.00231	8.1e-05	0.282978	3.3e-05	7.2	13.5	405	459	-0.93	152	-98	[10]
Dananhu area	granidiorite	311	D01.4	316	0.063932	0.00232	0.002586	8.9e-05	0.282923	2.8e-05	5.3	11.7	490	584	-0.92	268	-174	[10]
Dananhu area	granidiorite	311	D01.5	315	0.044521	0.000985	0.001809	4.2e-05	0.282969	3.1e-05	6.9	13.5	413	469	-0.95	154	-98	[10]
Dananhu area	granidiorite	311	D01.6	313	0.074094	0.00233	0.002831	8.3e-05	0.283036	3.2e-05	9.3	15.6	324	330	-0.91	17	-11	[10]
Dananhu area	granidiorite	311	D01.7	308	0.100347	0.000354	0.003761	1e-05	0.283005	4e-05	8.2	14.2	381	417	-0.89	109	-73	[10]
Dananhu area	granidiorite	311	D01.8	316	0.13883	0.000446	0.005175	1.4e-05	0.282967	3e-05	6.8	12.7	458	519	-0.84	203	-142	[10]
Dananhu area	granidiorite	311	D01.9	308	0.089514	0.00146	0.003463	4.9e-05	0.283029	3.3e-05	9	15.1	341	357	-0.9	49	-33	[10]
Dananhu area	granidiorite	311	D01.10	304	0.050085	0.00079	0.002101	2.8e-05	0.283012	3.4e-05	8.4	14.7	354	381	-0.94	77	-50	[10]
Dananhu area	granidiorite	311	D01.11	291	0.033064	0.00147	0.001487	6.1e-05	0.282928	3.5e-05	5.4	11.6	469	573	-0.96	282	-178	[10]
Dananhu area	granidiorite	311	D01.12	322	0.066955	0.000858	0.002807	3.5e-05	0.282925	3.1e-05	5.3	11.8	490	580	-0.92	258	-168	[10]
Dananhu area	granidiorite	311	D01.13	289	0.076591	0.000275	0.002983	1e-05	0.28296	3.9e-05	6.6	12.4	440	518	-0.91	229	-151	[10]
Dananhu area	granidiorite	311	D01.14	296	0.050587	0.00137	0.002147	5.4e-05	0.282917	3.2e-05	5.1	11.1	493	602	-0.94	306	-197	[10]
Dananhu area	granidiorite	311	D01.15	306	0.054741	0.00189	0.002275	7.2e-05	0.282931	3.7e-05	5.6	11.8	474	567	-0.93	261	-168	[10]
Yandong deposit	granodiorite porphyry	322	yd-42-1	327.765	0.063302	0.00115646	0.00228904	3.99336e-05	0.282961	3.12908e-05		13.4111	426.632	480.336	-0.931053	152.572	-98.8668	This study
Yandong deposit	granodiorite porphyry	322	yd-42-3	319.14	0.0753303	0.0014171	0.00267228	3.39562e-05	0.282985	1.53569e-05		13.9765	396.555	437.338	-0.91951	118.198	-77.4143	This study
Yandong deposit	granodiorite porphyry	322	yd-42-5	316.572	0.0869791	0.000766396	0.00303932	2.44168e-05	0.282994	1.58933e-05		14.1957	385.854	421.266	-0.908454	104.694	-69.2816	This study
Yandong deposit	granodiorite porphyry	322	yd-42-6	327.583	0.0489166	0.000514663	0.00183936	1.39811e-05	0.282979	1.61485e-05		14.1363	395.472	433.654	-0.944598	106.07	-67.8885	This study
Yandong deposit	granodiorite porphyry	322	yd-42-7	317.166	0.0589859	0.000288043	0.00216763	7.02513e-06	0.28298	1.69591e-05		13.8878	397.466	441.501	-0.93471	124.336	-80.3	This study
Yandong deposit	granodiorite porphyry	322	yd-42-8	329.085	0.0696941	0.0011208	0.00257652	3.72874e-05	0.282968	2.07996e-05		13.6018	420.562	469.128	-0.922394	140.043	-91.4765	This study
Yandong deposit	granodiorite porphyry	322	yd-42-9	328.516	0.0703847	0.00217981	0.00252542	5.71865e-05	0.282917	2.43412e-05		11.8226	494.365	582.78	-0.923933	254.264	-165.849	This study
Yandong deposit	granodiorite porphyry	322	yd-42-10	322.169	0.0792608	0.00125982	0.00284806	4.47758e-05	0.282922	2.44791e-05		11.8008	491.381	579.255	-0.914215	257.086	-169.212	This study
Yandong deposit	granodiorite porphyry	322	yd-42-11	320.333	0.083928	0.000716256	0.0030167	2.74582e-05	0.282995	2.09549e-05		14.2922	384.919	417.994	-0.909135	97.6608	-64.5859	This study
Yandong deposit	granodiorite porphyry	322	yd-42-12	331.901	0.0530397	0.000367139	0.00197298	1.02769e-05	0.282966	2.39064e-05		13.7513	415.298	461.726	-0.940573	129.825	-83.3967	This study
Yandong deposit	granodiorite porphyry	322	yd-42-13	326.425	0.0549372	0.000610668	0.00200163	2.0857e-05	0.282927	2.36785e-05		12.2241	473.649	555.43	-0.93971	229.005	-147.224	This study
Yandong deposit	granodiorite porphyry	322	yd-42-14	322.99	0.0579373	0.000585584	0.00216285	1.73542e-05	0.282907	2.18052e-05		11.4352	504.017	603.328	-0.934854	280.338	-181.028	This study
Yandong deposit	granodiorite porphyry	322	yd-42-15	317.249	0.0688931	0.000583304	0.00240964	1.73553e-05	0.282971	2.36602e-05		13.5003	414.247	466.436	-0.92742	149.187	-96.9975	This study
Northeast of Tuwu	gabbro	315	kbdb-5-1-1	312.285	0.039739	0.000556558	0.00157953	2.34062e-05	0.282979	1.84074e-05	7.30592	13.8542	393.364	439.865	-0.952424	127.581	-81.0795	This study
Northeast of Tuwu	gabbro	315	kbdb-5-2-1	314.056	0.0729212	0.00128476	0.00272555	5.05826e-05	0.282926	1.86456e-05	5.45128	11.797	484.041	573.207	-0.917905	259.152	-169.986	This study
Northeast of Tuwu	gabbro	315	kbdb-5-3	314.056	0.0756833	0.000720772	0.00287997	1.89895e-05	0.282987	1.96844e-05	7.59502	13.9101	395.476	437.647	-0.913254	123.591	-81.4194	This study
Northeast of Tuwu	gabbro	315	kbdb-5-4	312.173	0.0637118	0.00273733	0.00237982	9.67908e-05	0.282988	1.80327e-05	7.63449	14.0151	388.357	429.445	-0.928319	117.273	-76.1846	This study
Northeast of Tuwu	gabbro	315	kbdb-5-5	315.365	0.084554	0.00232624	0.00316428	7.72535e-05	0.283031	2.01229e-05	9.16367	15.4468	331.686	339.942	-0.90469	24.5769	-16.3215	This study
Northeast of Tuwu	gabbro	315	kbdb-5-6	324.886	0.0520056	0.000117248	0.0022443	3.19673e-06	0.283033	1.80191e-05	9.21446	15.8862	321.157	319.124	-0.932401	-5.76215	3.72927	This study
Northeast of Tuwu	gabbro	315	kbdb-5-8	320.58	0.0349248	0.000741724	0.00146578	3.53494e-05	0.282961	1.99893e-05	6.66668	13.4132	418.173	474.62	-0.95585	154.04	-97.5937	This study
Northeast of Tuwu	gabbro	315	kbdb-5-9	311.853	0.092057	0.00146269	0.0034407	4.73171e-05	0.282974	2.5245e-05	7.13695	13.2914	421.489	475.648	-0.896365	163.794	-109.636	This study
Northeast of Tuwu	gabbro	315	kbdb-5-11	318.749	0.0502477	0.000545444	0.00196675	2.05032e-05	0.282913	2.1006e-05	4.9797	11.5806	493.433	590.727	-0.94076	271.978	-174.683	This study
Northeast of Tuwu	gabbro	315	kbdb-5-12	312.977	0.0355102	0.000169293	0.00137594	5.17841e-06	0.282961	1.93601e-05	6.69465	13.2993	416.027	476.025	-0.958556	163.048	-103.05	This study
Northeast of Tuwu	gabbro	315	kbdb-5-13	319.012	0.0382044	0.000806364	0.00153575	2.98003e-05	0.282949	1.68868e-05	6.2521	12.9505	435.862	503.096	-0.953743	184.084	-116.849	This study
Northeast of Tuwu	gabbro	315	kbdb-5-14	309.145	0.054143	0.00159655	0.00199391	6.34389e-05	0.283039	2.43256e-05	9.43686	15.8356	309.757	310.096	-0.939942	0.951067	-0.611298	This study
Northeast of Tuwu	gabbro	315	kbdb-5-15	315.758	0.0344577	0.00126239	0.00137972	4.82686e-05	0.282946	2.23279e-05	6.15489	12.8172	437.977	509.116	-0.958442	193.359	-122.219	This study
Northeast of Tuwu	gabbro	315	kbdb-5-16	311.568	0.0922531	0.00166129	0.00342799	6.36102e-05	0.282998	2.35581e-05	7.97791	14.1299	385.189	421.597	-0.896747	110.028	-73.6207	This study
Linglong deposit	granite porphyry	310	LL-6.01	312.4	0.282924		0.001238		0.031846		5.36	11.98	468	560	-0.96	247.6	-155.6	This study
Linglong deposit	granite porphyry	310	LL-6.02	308.2	0.282886		0.002499		0.068273		4.05	10.32	540	663	-0.92	354.8	-231.8	This study
Linglong deposit	granite porphyry	310	LL-6.04	308	0.282922		0.001759		0.047247		5.32	11.74	477	572	-0.95	264	-169	This study
Linglong deposit	granite porphyry	310	LL-6.05	311.2	0.282957		0.001915		0.053443		6.54	12.99	429	494	-0.94	182.8	-117.8	This study
Linglong deposit	granite porphyry	310	LL-6.07	315	0.282951		0.002088		0.05513		6.34	12.84	439	507	-0.94	192	-124	This study
Linglong deposit	granite porphyry	310	LL-6.08	300.9	0.282928		0.001488		0.041042		5.53	11.85	465	559	-0.96	258.1	-164.1	This study
Linglong deposit	granite porphyry	310	LL-6.09	314	0.282949		0.002322		0.061957		6.27	12.7	445	515	-0.93	201	-131	This study
Linglong deposit	granite porphyry	310	LL-6.11	311.7	0.282941		0.00174		0.048441		5.96	12.46	450	529	-0.95	217.3	-138.3	This study
Linglong deposit	granite porphyry	310	LL-6.12	305.2	0.282919		0.002668		0.071948		5.21	11.39	493	592	-0.92	286.8	-187.8	This study
Linglong deposit	granite porphyry	310	LL-6.14	312.2	0.282919		0.002172		0.060654		5.2	11.62	487	583	-0.93	270.8	-174.8	This study
Linglong deposit	granite porphyry	310	LL-6.16	306.6	0.282933		0.001995		0.05551		5.68	12.03	465	553	-0.94	246.4	-158.4	This study
εHf(0) = [(176Hf/177Hf)S/(176Hf/177Hf)CHUR,0 − 1] · 10000;
εHf(t) = {[(176Hf/177Hf)S − (176Lu/177Hf)S · (eλt − 1)] / [(176Hf/177Hf)CHUR,0 − (176Lu/177Hf)CHUR,0 · (eλt − 1)] − 1} · 10000;
TDM1 = 1/λ · ln{1 + [(176Hf/177Hf)S − (176Hf/177Hf)DM] / [(176Lu/177Hf)S − (176Lu/177Hf)DM];
TDM2 = TDM1 − (TDM1 − t) · (ƒcc − ƒs) · (ƒcc − ƒDM);
ƒLu/Hf = [(176Lu/177Hf)S/(176Lu/177Hf)CHUR,0] − 1;
where, (176Hf/177Hf)S and (176Lu/177Hf)S are measures values of samples, s = sample, t = crystallization time of zircon; (176Lu/177Hf)CHUR,0 = 0.0332 and (176Hf/177Hf)CHUR,0 = 0.282772 (Blichert-Toft and Albarède, 1997); (176Lu/177Hf)DM = 0.0384 and (176Hf/177Hf)DM = 0.28325 (Griffin et al., 2000); ƒcc = ﹣0.55 and ƒDM = 0.16; λ = 1.867 × 10-12 / yr- 1 (Söderlund et al., 2004) was used in the calc…
References:
[1]. Du, L., et al., Petrogenesis and Geodynamic Implications of the Carboniferous Granitoids in the Dananhu Belt, Eastern Tianshan Orogenic Belt. Journal of Earth Science, 2019. 30(6): p. 1243-1252.
[2]. Wang, Y., et al., Origin of the subduction-related Carboniferous intrusions associated with the Yandong porphyry Cu deposit in eastern Tianshan, NW China: constraints from geology, geochronology, geochemistry, and Sr–Nd–Pb–Hf–O isotopes. Mineralium Deposita, 2018. 53(5): p. 629-647.
[3]. Wang, Y., et al., Carboniferous magmatism and mineralization in the area of the Fuxing Cu deposit, Eastern Tianshan, China: Evidence from zircon U–Pb ages, petrogeochemistry, and Sr–Nd–Hf–O isotopic compositions. Gondwana Research, 2016. 34: p. 109-128.
[4]. Wang, Y., et al., Petrogenesis of magmatism in the Yandong region of Eastern Tianshan, Xinjiang: geochemical, geochronological, and Hf isotope constraints. International Geology Review, 2015. 57(9-10): p. 1130-1151.
[5]. Wang, Y., et al., Early Carboniferous adakitic rocks in the area of the Tuwu deposit, eastern Tianshan, NW China: Slab melting and implications for porphyry copper mineralization. Journal of Asian Earth Sciences, 2015. 103: p. 332-349.
[6]. Wang, Y., et al., Geochemistry, geochronology, Hf isotope, and geological significance of the Tuwu porphyry copper deposit in eastern Tianshan, Xinjiang. Acta Petrologica Sinica, 2014. 30(11): p. 3383-3399.
[7]. Han, Z., et al., Palaeozoic porphyry Cu–Au and ultramafic Cu–Ni deposits in the eastern Tianshan orogenic belt: temporal constraints from U–Pb geochronology. International Geology Review, 2013. 55(7): p. 842-862.
[8]. Sun, M., et al., Petrogenesis of Late Carboniferous intrusions in the Linglong area of Eastern Tianshan, NW China, and tectonic implications: Geochronological, geochemical, and zircon Hf–O isotopic constraints. Ore Geology Reviews, 2020. 120: p. 103462.
[9]. Zhang, F., Y. Wang and J. Liu, Petrogenesis of Late Carboniferous granitoids in the Chihu area of Eastern Tianshan, Northwest China, and tectonic implications: geochronological, geochemical, and zircon Hf–O isotopic constraints. International Geology Review, 2016. 58(8): p. 949-966.
[10]. Mao, Q., et al., Silurian to early Permian slab melting and crustal growth in the southern Altaids: insights from adakites and associated mineral deposits in the Dananhu arc, Eastern Tianshan, NW China. International Journal of Earth Sciences, 2021. 110(6): p. 2115-2131.
