# Supplementary material
Source: MDPI journal article supplement (https://www.mdpi.com/2075-163X/12/12/1573)
Supplement: s1 [file Supplementary Table S3.xlsx]

## Sheet: Sheet1
Supplementary Table S3
Published Sr–Nd isotopic compositions of Carboniferous magmatic rocks in the Tuwu-Yandong belt (and adjacent areas in the middle section of the Dananhu island arc)
Location	Sample no.	Rock type	Age-corrected (Ma)	Rb (ppm)	Sr (ppm)	87Rb/86Sr	87Sr/86Sr	2σ	(87Sr/86Sr)i	Sm (ppm)	Nd (ppm)	147Sm/144Nd	143Nd/144Nd	2σ	(143Nd/144Nd)i	εNd(t)	TDM (Ma)	TDM2 (Ma)	Reference
Carboniferous intrusiv rocks
Heicaotan	X3ET373	porphyritic granite	357	101.3	166.5	1.76261	0.712301	7e-06	0.703368	5.082	26.44	0.116205	0.512764	4e-06		6.13163	605.711	613.545	[1]
Fuxing deposit	15FX-90	plagiogranite porphyry	332.1			1	0.708747	1e-05	0.704032			0.1	0.512707	2.4e-05	0.51249	5.5	597	647	[2]
Fuxing deposit	15FX-91	plagiogranite porphyry	332.1			1.48	0.710263	9e-06	0.703264			0.09	0.512692	2e-05	0.512499	5.6	561	632	[2]
Fuxing deposit	15FX-92	plagiogranite porphyry	332.1			1.64	0.711239	1.1e-05	0.703467			0.11	0.512785	1.6e-05	0.512553	6.7	523	546	[2]
Fuxing deposit	15FX-94	plagiogranite porphyry	332.1			0.75	0.707563	1.6e-05	0.703995			0.1	0.512703	9e-06	0.512485	5.4	605	655	[2]
Yandong deposit	YD-3104-45-6	tonalite	335.3	61.3	255	0.69608	0.705202	1.06664e-05	0.70188	1.07	5.11	0.126591	0.512819	2.10387e-05	0.512541	6.53084	584.15	561.781	[3]
Yandong deposit	YD2-6307-24	tonalite	335.3	65.6	349	0.544273	0.705246	1.41315e-05	0.702648	2.68	14.8	0.109474	0.512819	2.196e-05	0.512579	7.26893	487.543	501.125	[3]
Yandong deposit	YD2-6307-25	tonalite	335.3	37.8	447	0.244863	0.703927	1.20954e-05	0.702759	2.94	16.9	0.105172	0.512793	2.47357e-05	0.512563	6.95784	503.968	526.608	[3]
Yandong deposit	YD-005-969-22	tonalite	335.3	36.7	1128	0.0942097	0.705597	1.22158e-05	0.705147	5.55	38.5	0.0871509	0.512785	3.4687e-05	0.512594	7.57403	441.68	476.018	[3]
Yandong deposit	YD2-6307-29	tonalite	335.3	43.5	437	0.288235	0.704962	1.15047e-05	0.703587	2.36	13.3	0.107275	0.512796	2.16667e-05	0.512561	6.9186	510.21	529.838	[3]
Yandong deposit	YD2-6307-23	tonalite	335.3	64.7	532	0.352153	0.704887	1.14724e-05	0.703207	2.13	12.2	0.10555	0.512799	1.71295e-05	0.512567	7.05384	497.598	518.74	[3]
Yandong deposit	YD2-6307-31	tonalite	335.3	44.3	309	0.41513	0.705285	1.25687e-05	0.703303	2.32	15.7	0.0893363	0.51271	2.63576e-05	0.512514	6.0146	541.865	603.819	[3]
Yandong deposit	YD-6	tonalite	335.3	39.7	352	0.326578	0.705149	1.31484e-05	0.70359	2.27	11.6	0.118306	0.512728	7.73733e-06	0.512468	5.11075	679.201	678.099	[3]
Yandong deposit	YD-7	tonalite	335.3	38.8	285	0.394208	0.704756	1.16364e-05	0.702875	1.86	9.47	0.118741	0.512772	9.11039e-06	0.512512	5.96342	610.362	608.228	[3]
Yandong deposit	YD-005-968-23	tonalite	335.3	45.3	582	0.225379	0.705778	1.19897e-05	0.704702	1.48	8.6	0.104041	0.512813	2.06094e-05	0.512584	7.38213	471.868	491.815	[3]
Tuwu deposit	R-01	plagiogranite porphyry	333	20	624	0.09	0.703877	1.2e-05	0.703459			0.12	0.512944		5.97	9.16	350		[4]
Tuwu deposit	R-02	plagiogranite porphyry	333	19	391	0.14	0.704099	1.1e-05	0.703465			0.11	0.512806		3.28	6.94	520		[4]
Tuwu deposit	R-03	plagiogranite porphyry	333	26	457	0.16	0.703955	1.4e-05	0.703219			0.11	0.512812		3.39	7.08	510		[4]
Tuwu deposit	R-04	plagiogranite porphyry	333	20	327	0.18	0.704175	1.3e-05	0.703374			0.12	0.51287		4.53	7.97	440		[4]
Tuwu deposit	R-06	plagiogranite porphyry	333	58	452	0.37	0.704975	1.1e-05	0.703306			0.1	0.512767		2.52	6.67	520		[4]
Tuwu deposit	R-07	plagiogranite porphyry	333	65	293	0.63	0.706739	2.4e-05	0.703853			0.1	0.51273		1.79	5.83	580		[4]
Yandong deposit	YD203	plagiogranite porphyry	333	20	473	0.12	0.704377	1.7e-05	0.70383	2.51	11.3	0.13	0.512757	1.3e-05	2.32	5.02	762	692	[4]
Tuwu deposit	TW208	plagiogranite porphyry	333	40	630	0.18	0.704286	1.1e-05	0.703466	1.77	9.8	0.11	0.512744	9e-06	2.07	5.87	595	623	[4]
Tuwu deposit	TW203	plagiogranite porphyry	333	31	321	0.27	0.704783	1e-05	0.703531	1.12	6.2	0.11	0.512773	1.1e-05	2.63	6.43	553	576	[4]
Tuwu deposit	TW204	plagiogranite porphyry	333	38	552	0.19	0.70425	1.2e-05	0.703363	2.43	11.6	0.13	0.512824	1.2e-05	3.63	6.64	580	557	[4]
Tuwu deposit	TW219	plagiogranite porphyry	333	19	679	0.08	0.703898	1.3e-05	0.703534	4.16	19.9	0.13	0.512872	1.1e-05	4.56	7.62	490	476	[4]
Yandong deposit	YD13-114-1	plagiogranite porphyry	333	51	140	1.05	0.709044	8e-06	0.704281	1.42	6.7	0.13	0.512809	5e-06	3.33	6.31	624	591	[5]
Fuxing deposit	15FX-89	monzogranite	328.4			0.64	0.70608	1.3e-05	0.703078			0.1	0.512922	8e-06	0.512717	9.8	296	288	[2]
Yandong deposit	YD13-1-1	quartz albite porphyry	324	28	853	0.09	0.70412	7e-06	0.703693	2.92	13.1	0.13	0.512786	3e-06	2.89	5.42	666	627	[5]
Yandong deposit	YD13-143	quartz albite porphyry	324	39	739	0.15	0.704258	7e-06	0.703567	3.04	13.5	0.14	0.512771	4e-06	2.59	5.07	787	686	[5]
Northeast of Chihu	X3ET460	K-feldspar granite	311	19.27	85.05	0.656398	0.707479	4e-06	0.704574	1.363	5.509	0.149583	0.512829	3e-06		5.60994	766.146	620.152	[1]
Northeast of Chihu	X3ET461	K-feldspar granite	311	59.48	232.3	0.741791	0.707784	8e-06	0.7045	3.352	17.3	0.11714	0.512702	8e-06		4.40647	710.511	720.31	[1]
Northeast of Chihu	X3ET464	K-feldspar granite	311	22.22	68.1	0.945272	0.707494	5e-06	0.70331	0.876	4.196	0.126218	0.512785	6e-06		5.67175	639.063	615.006	[1]
Yandong deposit	YD-42	granodiorite porphyry	322	15.92	234	0.196863	0.704706	6e-06	0.703804	1.439	7.886	0.110252	0.512782	8e-06	2.809	6.3691	544.972	563.028	This study
Yandong deposit	YD-46	granodiorite porphyry	322	16.29	326.6	0.144325	0.704614	6e-06	0.703953	1.934	11.07	0.105558	0.512777	8e-06	2.71147	6.46467	528.387	555.226	This study
Yandong deposit	YD-55-4-95	granodiorite porphyry	322	18.19	371.3	0.141757	0.704457	7e-06	0.703807	2.179	11.68	0.112719	0.512802	7e-06	3.19914	6.65802	528.068	539.442	This study
Northeast of Tuwu	KBDB-5	gabbro	315	9.531	287.2	0.0960265	0.704312	6e-06	0.703882	3.871	16.32	0.143314	0.512898	6e-06	5.07181	7.22514	549.402	487.371	This study
Northeast of Tuwu	KBDB-6	gabbro	315	15.69	327.5	0.138627	0.704302	6e-06	0.703681	2.673	10.55	0.153084	0.512895	7e-06	5.01328	6.7732	645.471	524.275	This study
Northeast of Tuwu	KBDB-7	gabbro	315	19.35	360.8	0.155186	0.70451	5e-06	0.703814	2.789	11.25	0.149789	0.512881	7e-06	4.74019	6.63255	645.615	535.758	This study
Linglong deposit	LL-5	granite porphyry	310	28.77	253.2	0.328786	0.706449	8e-06	0.704998	2.495	13.83	0.109001	0.512705	7e-06	1.30697	4.78254	650.59	682.61	This study
Linglong deposit	LL-6	granite porphyry	310	38.38	214.5	0.517744	0.707114	9e-06	0.70483	2.868	15.71	0.110303	0.512724	8e-06	1.6776	5.1019	630.763	656.559	This study
Linglong deposit	LL-9	granite porphyry	310	52.84	314.4	0.486315	0.706689	8e-06	0.704544	2.346	13	0.109036	0.512727	6e-06	1.73612	5.21067	618.765	647.685	This study
Linglong deposit	LL-10	granite porphyry	310	52.22	319.5	0.472937	0.706758	8e-06	0.704672	2.866	14.72	0.117639	0.512718	7e-06	1.56056	4.6941	688.397	689.823	This study
Carboniferous volcanic rocks
Qi’eshan Group	X3ET283	high-alumina basalt	337	0.71	756	0.0027	0.703522	8e-06	0.7035	2.96	12	0.149633	0.512912	5e-06	0.512589	7.3			[6]
Qi’eshan Group	X3ET285	high-alumina basalt	337	0.51	748	0.002	0.703493	8e-06	0.7035	2.98	12.1	0.148651	0.512905	5e-06	0.512584	7.2			[6]
Qi’eshan Group	X3ET286	high-alumina basalt	337	0.51	780	0.0019	0.703508	8e-06	0.7035	3.12	12.5	0.150498	0.512908	6e-06	0.512583	7.2			[6]
Qi’eshan Group	X3ET292	high-alumina basalt	337	16.2	660	0.071	0.703949	8e-06	0.7036	3.05	11.9	0.154903	0.5129	4e-06	0.512566	6.9			[6]
Qi’eshan Group	X3ET293	high-alumina basalt	337	12	736	0.047	0.703765	8e-06	0.7035	3.07	12.2	0.15244	0.512911	4e-06	0.512582	7.2			[6]
Qi’eshan Group	X3ET294	high-alumina basalt	337	1.76	625	0.0082	0.703523	9e-06	0.7035	3.33	13.1	0.153928	0.512918	5e-06	0.512586	7.3			[6]
Qi’eshan Group	Bb-158	basalt				0.08	0.704122		0.703771			0.14	0.512828		3.71	6.21	660		[7]
Qi’eshan Group	Bb-162	basalt				0.01	0.703679		0.703647			0.13	0.512854		4.21	7.22	520		[7]
Qi’eshan Group	Bb-270	basalt				0.01	0.703921		0.703881			0.11	0.512769		2.56	6.11	590		[7]
Qi’eshan Group	Bb-185	andesite				0.05	0.704031		0.703794			0.15	0.512861		4.35	6.41	680		[7]
Fuxing deposit	15FX-87	basalt	360			0.04	0.703679	1.5e-05	0.703454			0.15	0.512697	9e-06	0.512349	3.4	1053	838	[2]
Fuxing deposit	15FX-93	dacite	340			0.82	0.707973	8e-06	0.703981			0.14	0.512751	6e-06	0.512438	4.6	837	720	[2]
Tuwu deposit	TW201	andesite		4.2	707	0.02	0.703713	1.3e-05	0.703636	4.21	16.6	0.15	0.512859	1.2e-05	4.31	6.2	740		[4]
Tuwu deposit	TW206-1	basalt		8.11	978	0.02	0.703811	1.4e-05	0.703703	4.29	20.1	0.13	0.512855	1.3e-05	4.23	7.17	530		[4]
Tuwu deposit	TW206-2	basalt		3.1	709	0.01	0.704022	1.8e-05	0.703965	4.9	21	0.14	0.512861	1.3e-05	4.35	6.76	610		[4]
(87Sr/86Sr)i = (87Sr/86Sr)s − (87Rb/86Sr)s × (eλt − 1); 87Sr/86Sr = (Rb/Sr) × 2.8956; λRb–Sr = 1.42 × 10–11/a;
(143Nd/144Nd)i = (143Nd/144Nd)s − (147Sm/144Nd)s × (eλt – 1); 147Sm/144Nd = (Sm/Nd) × 0.60456; λSm–Nd = 6.54 × 10–12/a;
εNd(t) = 10,000 × [(143Nd/144Nd)i/(143Nd/144Nd)CHUR(t) − 1]; (143Nd/144Nd)CHUR(t) = (143Nd/144Nd)CHUR(0) − (147Sm/144Nd)CHUR × (eλt − 1);
(143Nd/144Nd)CHUR(0) = 0.512638; (147Sm/144Nd)CHUR = 0.1967;
TDM = 1/λ × ln{1 + [(143Nd/144Nd)S − (143Nd/144Nd)DM]/[(147Sm/144Nd)S − (147Sm/144Nd)DM]};
TDM2 = TDM − (TDM − t) × [(fc − fs)/(fc − fDM)];
fc = [(147Sm/144Nd)crust/(147Sm/144Nd)CHUR] − 1 = − 0.4; fs = fSm/Nd = (147Sm/144Nd)S/(147Sm/144Nd)CHUR − 1; fDM = [(147Sm/144Nd)DM/(147Sm/144Nd))CHUR] − 1 = 0.08592; (147Sm/144Nd)DM = 0.21357; (143Nd/144Nd)DM = 0.51315; (147Sm/144Nd) crust = 0.118; (87Sr/86Sr)S and (143Nd/144Nd)S are the measured values of the samples.
References:
[1]. Du, L., et al., Petrogenesis and Geodynamic Implications of the Carboniferous Granitoids in the Dananhu Belt, Eastern Tianshan Orogenic Belt. Journal of Earth Science, 2019. 30(6): p. 1243-1252.
[2]. Wang, Y., et al., Carboniferous magmatism and mineralization in the area of the Fuxing Cu deposit, Eastern Tianshan, China: Evidence from zircon U–Pb ages, petrogeochemistry, and Sr–Nd–Hf–O isotopic compositions. Gondwana Research, 2016. 34: p. 109-128.
[3]. Wang, Y., et al., Origin of the subduction-related Carboniferous intrusions associated with the Yandong porphyry Cu deposit in eastern Tianshan, NW China: constraints from geology, geochronology, geochemistry, and Sr–Nd–Pb–Hf–O isotopes. Mineralium Deposita, 2018. 53(5): p. 629-647.
[4]. Zhang, L., et al., The adakite connection of the Tuwu–Yandong copper porphyry belt, eastern Tianshan, NW China: trace element and Sr-Nd-Pb isotope geochemistry. Mineralium Deposita, 2006. 41(2): p. 188-200.
[5]. Xiao, B., et al., Magmatic evolution of the Tuwu–Yandong porphyry Cu belt, NW China: Constraints from geochronology, geochemistry and Sr–Nd–Hf isotopes. Gondwana Research, 2017. 43: p. 74-91.
[6]. Zhang, Y., et al., Alternating Trench Advance and Retreat: Insights From Paleozoic Magmatism in the Eastern Tianshan, Central Asian Orogenic Belt. Tectonics, 2018. 37(7): p. 2142-2164.
[7]. Xia, L., et al., Petrogenesis of Carboniferous rift-related volcanic rocks in the Tianshan, northwestern China. Geological Society of America Bulletin, 2004. 116(3-4): p. 419-433.
